# Supplementary material for: Synthesis of cucurbitacin IIa derivatives with apoptosis-inducing capabilities in human cancer cells
Source: Royal Society of Chemistry journal article supplement (doi:10.1039/c9ra09113k), 2020-01-01
Supplement: c9ra09113k1.pdf [file c9ra09113k1.pdf]

## Electronic Supporting Information (ESI)

# Synthesis of Cucurbitacin IIa Derivatives with Apoptosis-Inducing Capabilities in Human Cancer Cells

Kun Yu,<sup>†ab</sup> Xinmei Yang,<sup>†c</sup> Ying Li,<sup>ab</sup> Xue Cui,<sup>ab</sup> Bo Liu,<sup>\*ab</sup> and Qingqiang Yao<sup>\*ab</sup>

a. School of Medicine and Life Sciences, University of Jinan-Shandong Academy of Medical Sciences, Jinan 250200, Shandong, China

b. Institute of Materia Medica, Shandong First Medical University & Shandong Academy of Medical Sciences, Jinan 250062, Shandong, China

c. Department of Pharmacy, The First Affiliated Hospital of Shandong First Medical University, Jinan 250014, China

<sup>†</sup>These authors contributed equally to the work.

\*Corresponding authors: E-Mail: mls\_liub@ujn.edu.cn (Bo Liu), yao\_imm@163.com (Qingqiang Yao)

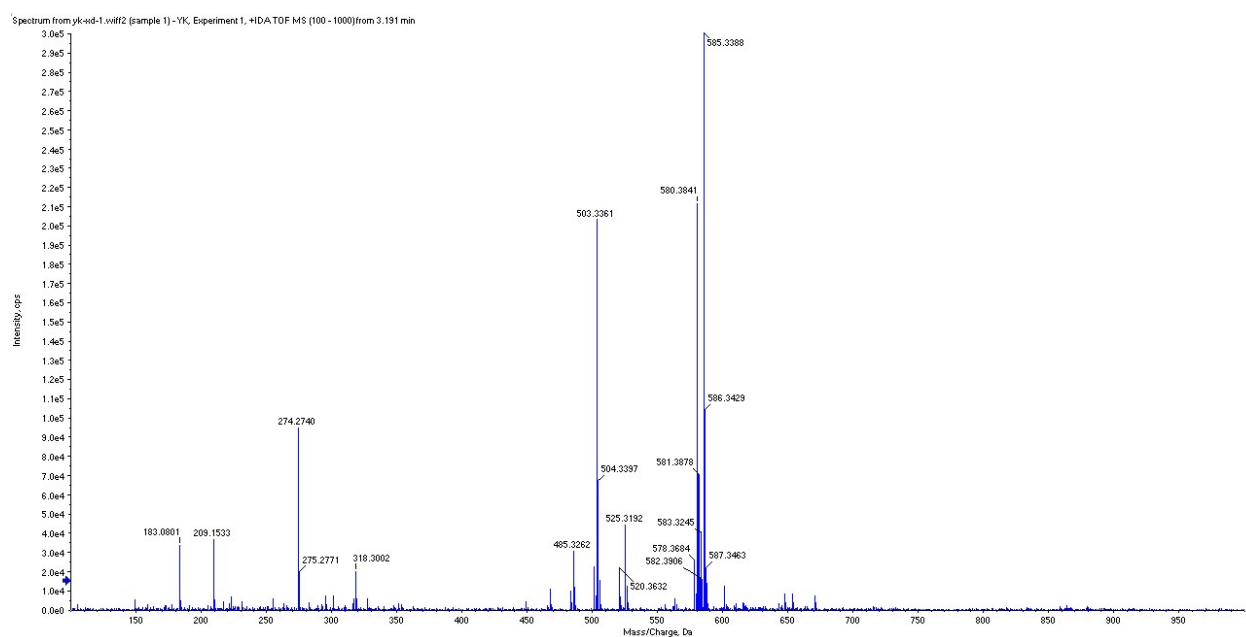

Fig. S1 HRMS spectrum of **1**

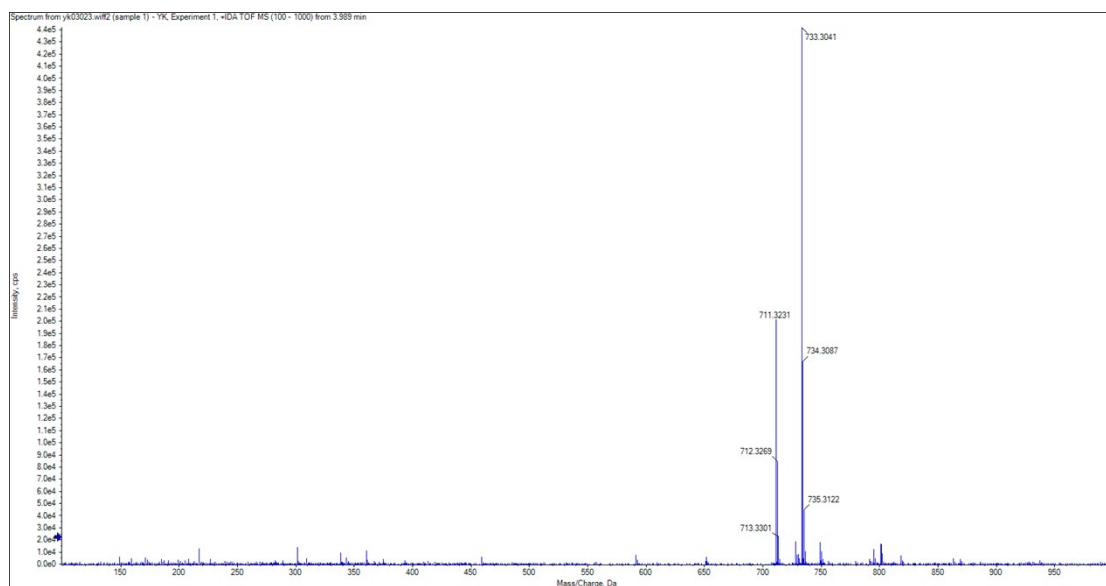

Fig. S2 HRMS spectrum of **2**

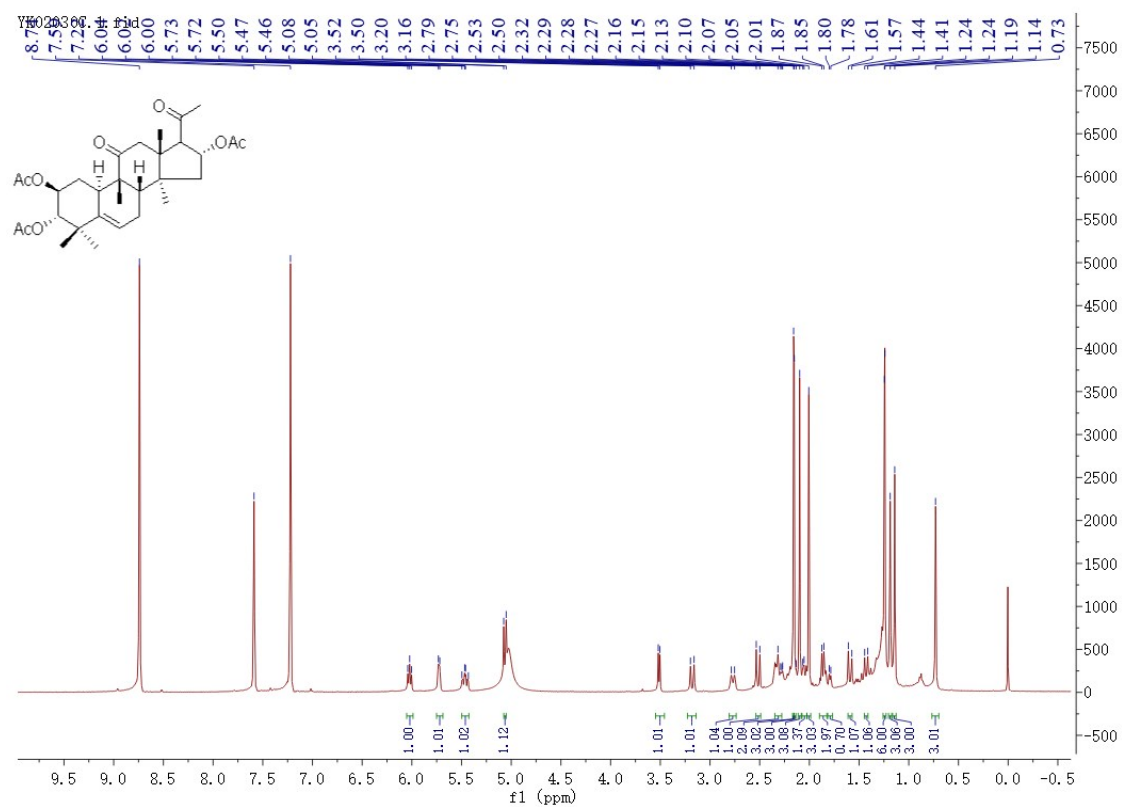

Fig. S3 <sup>1</sup>H NMR spectrum of **3**

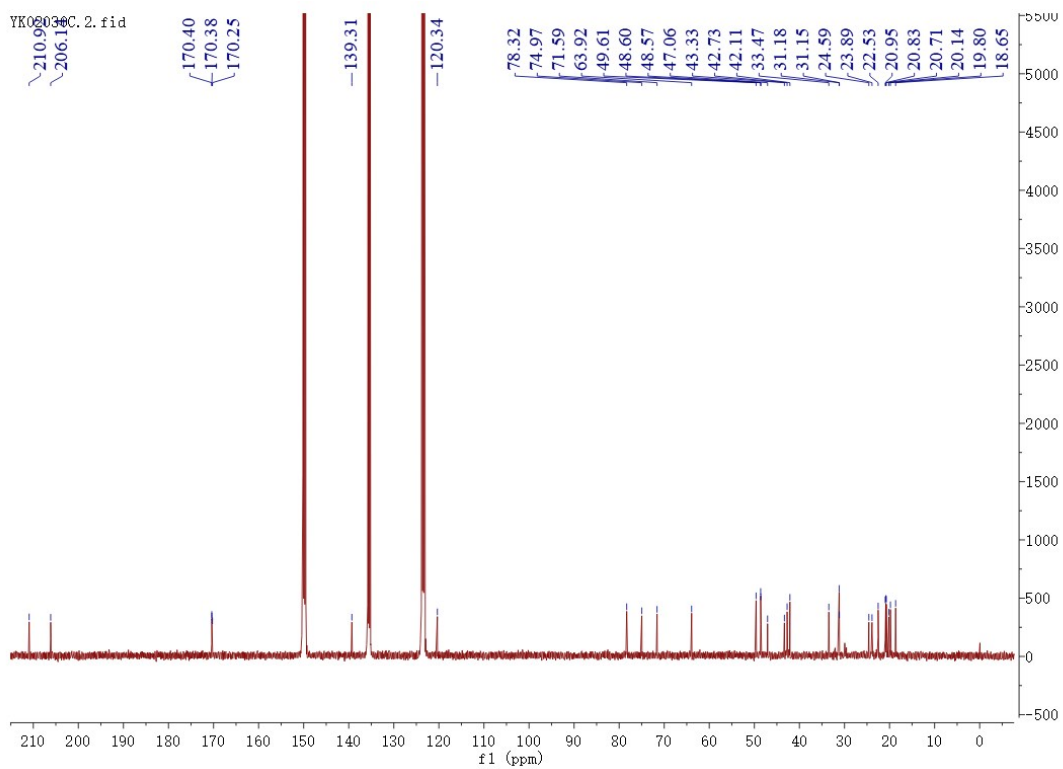

Fig. S4  $^{13}\text{C}$  NMR spectrum of **3**

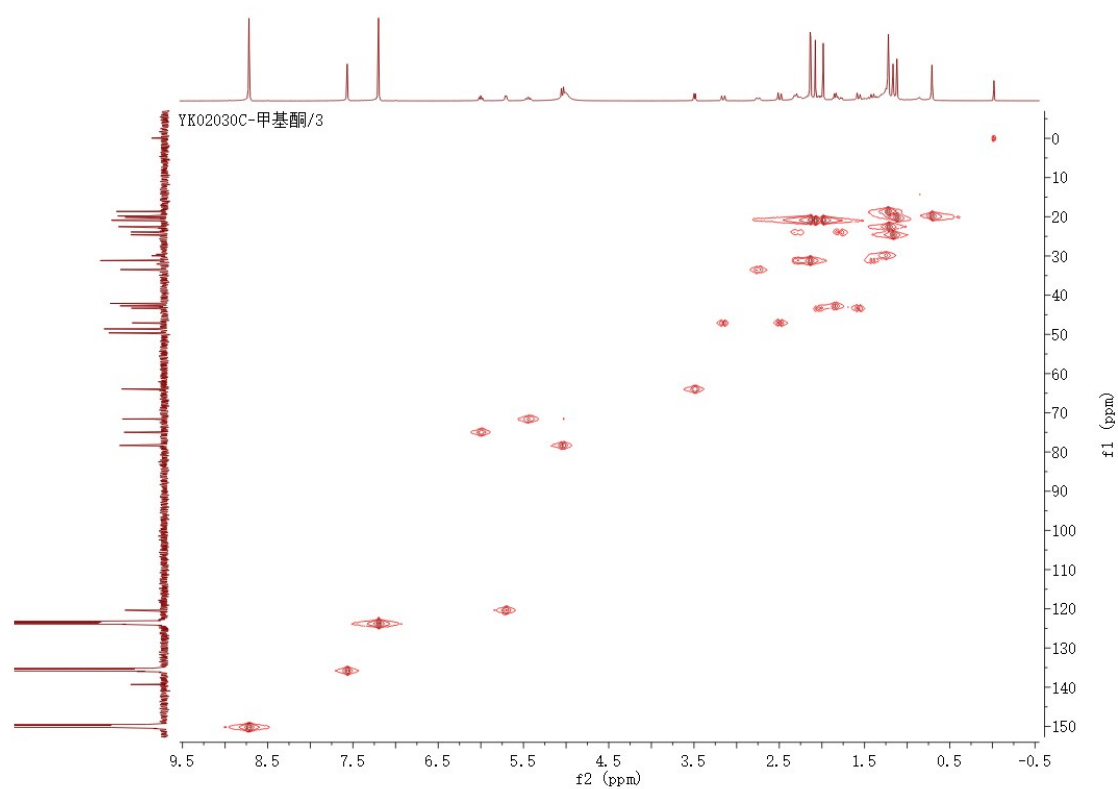

Fig. S5 HSQC spectrum of **3**

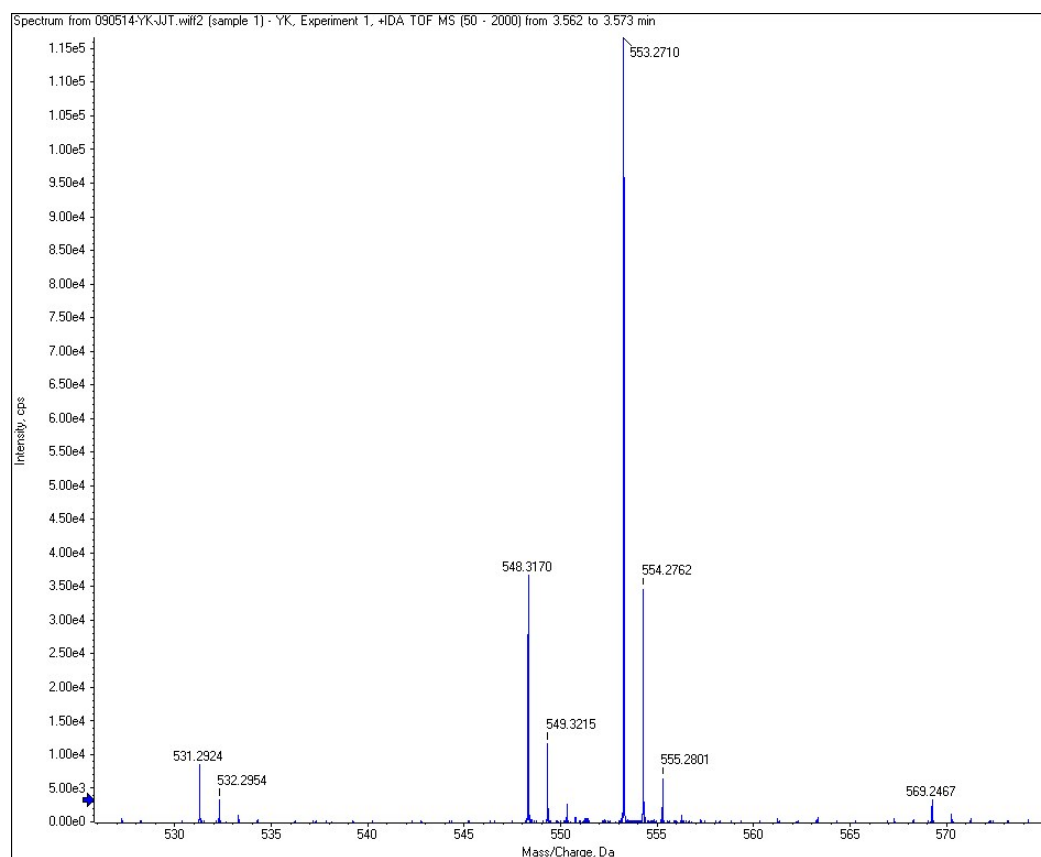

Fig. S6 HRMS spectrum of **3**

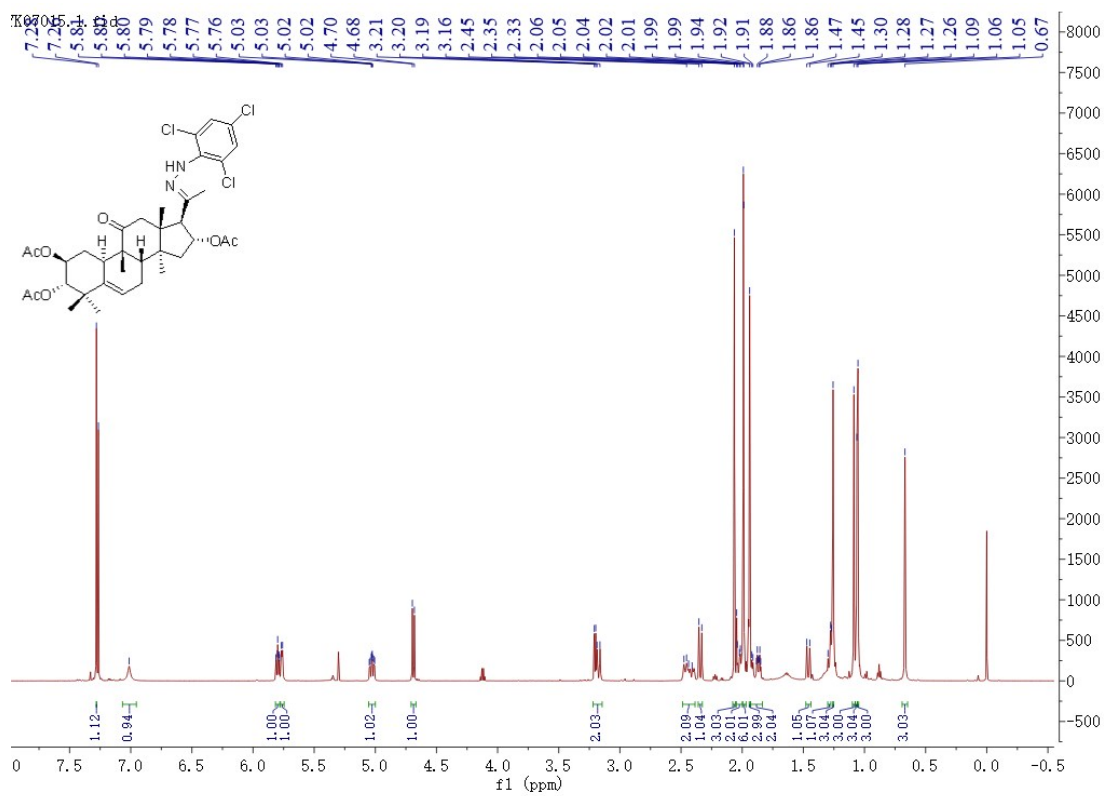

Fig. S7  $^1\text{H}$  NMR spectrum of **4a**

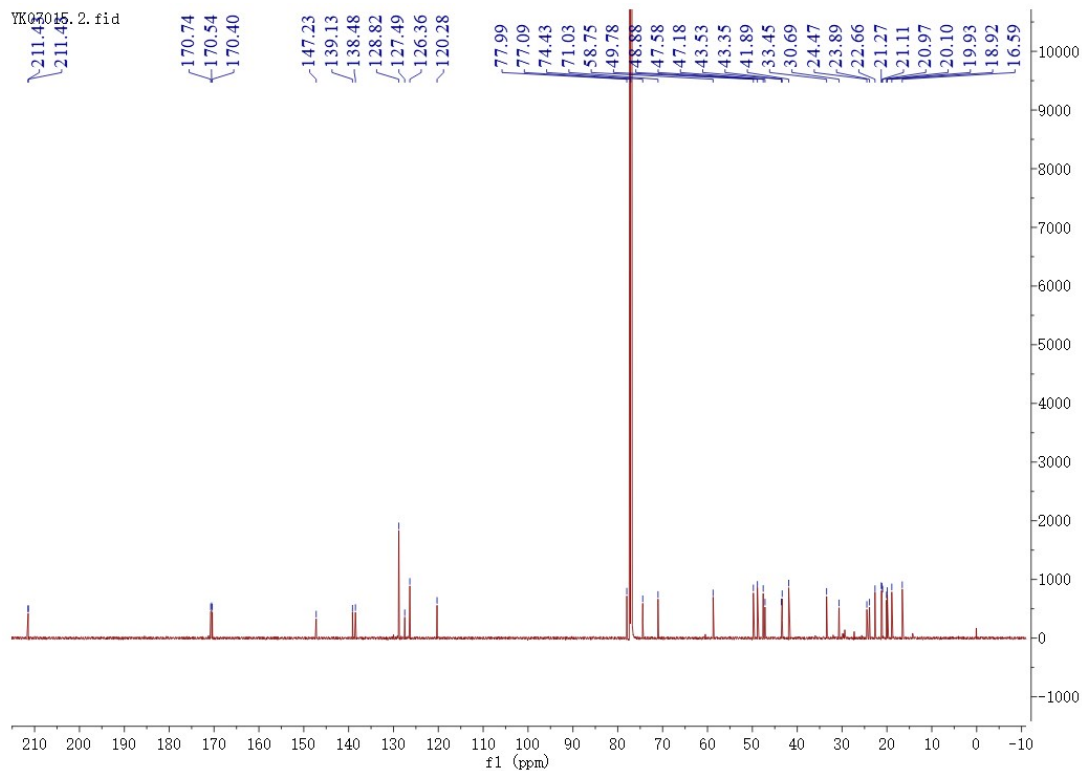

Fig. S8  $^{13}\text{C}$  NMR spectrum of **4a**

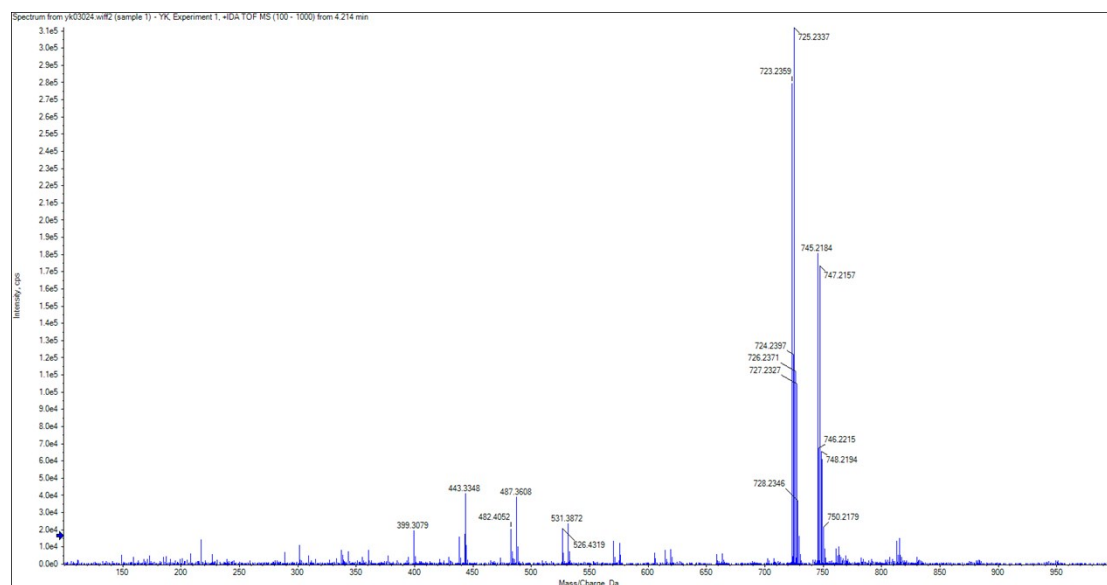

Fig. S9 HRMS spectrum of **4a**

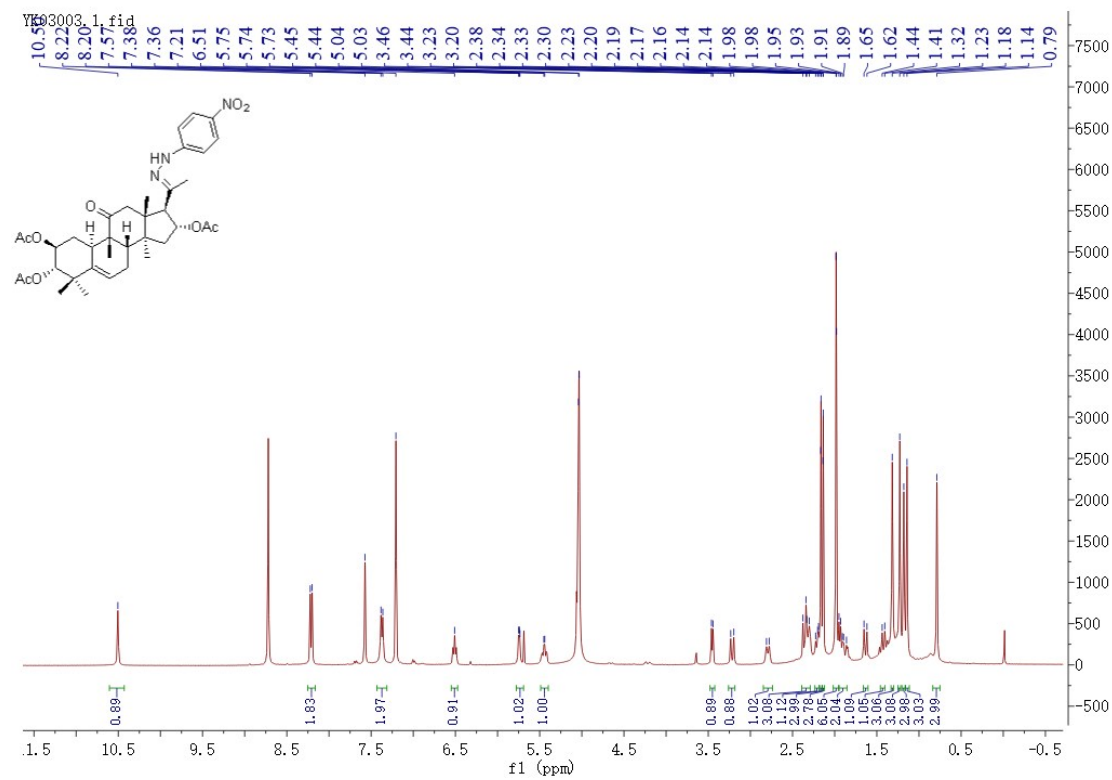

Fig. S10  $^1\text{H}$  NMR spectrum of 4b

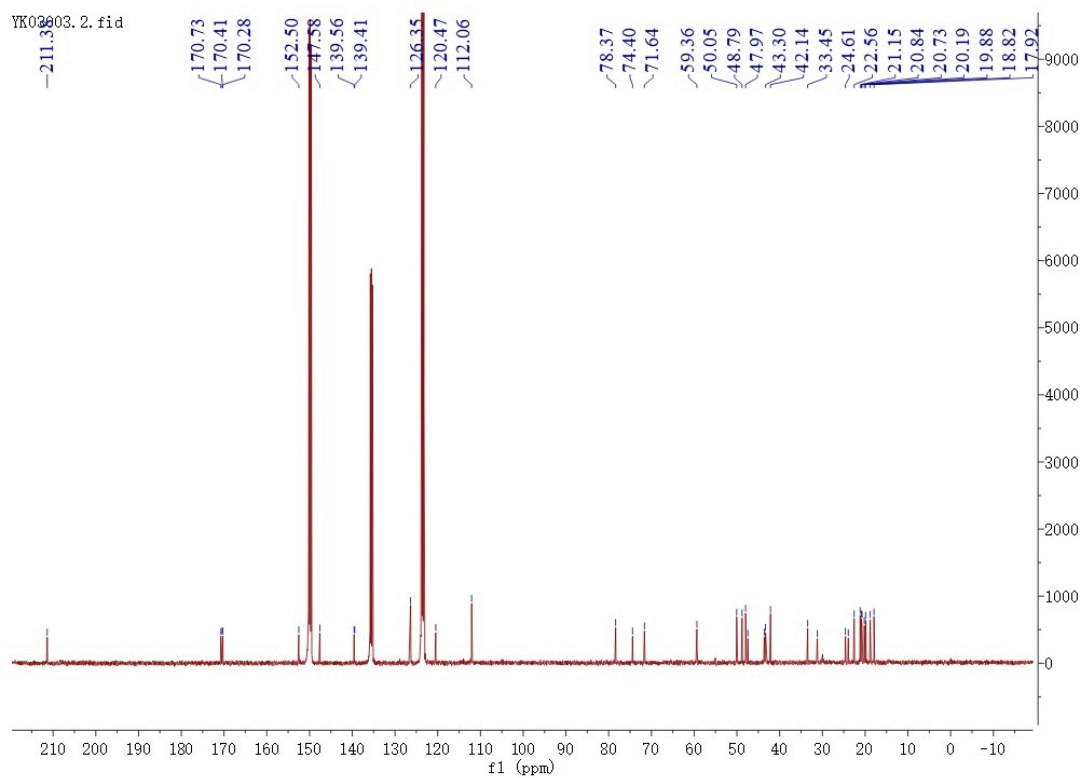

Fig. S11  $^{13}\text{C}$  NMR spectrum of 4b

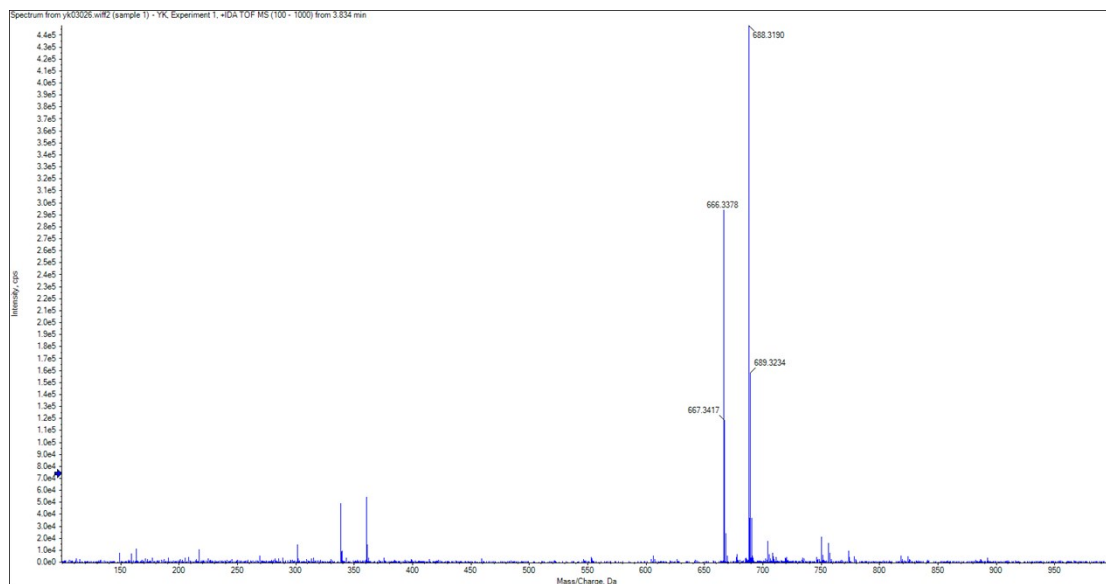

Fig. S12 HRMS spectrum of **4b**

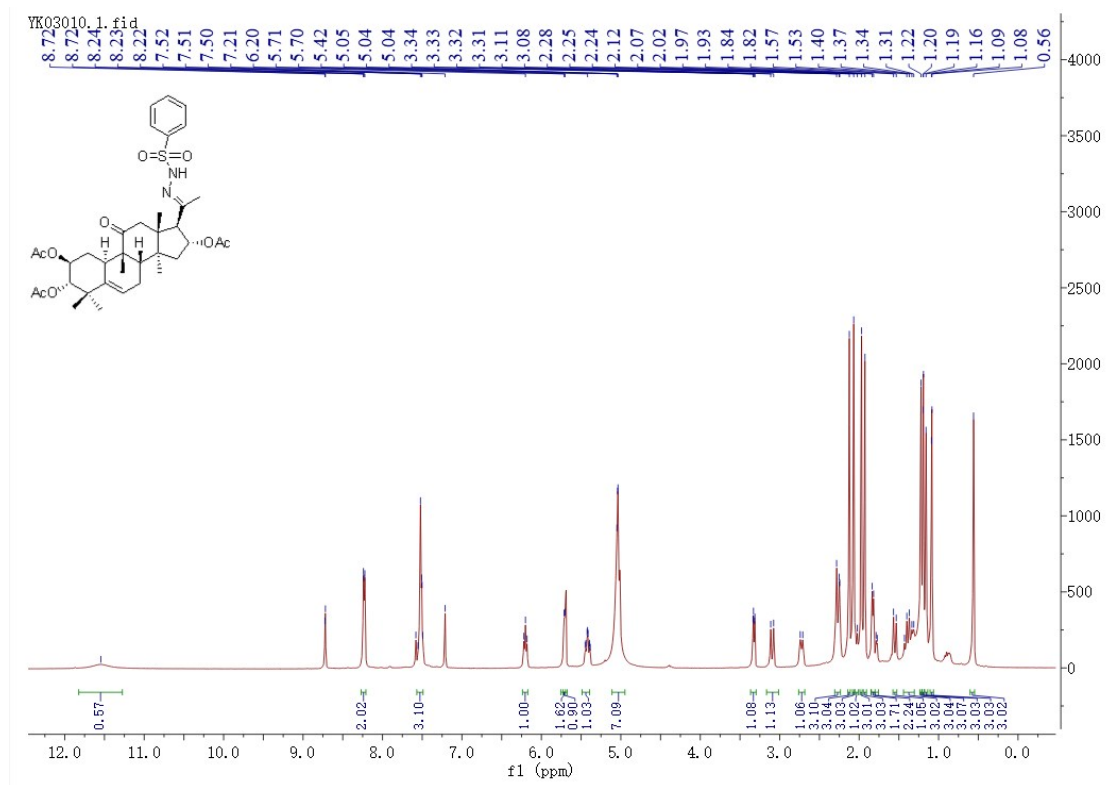

Fig. S13  $^1\text{H}$  NMR spectrum of **4c**

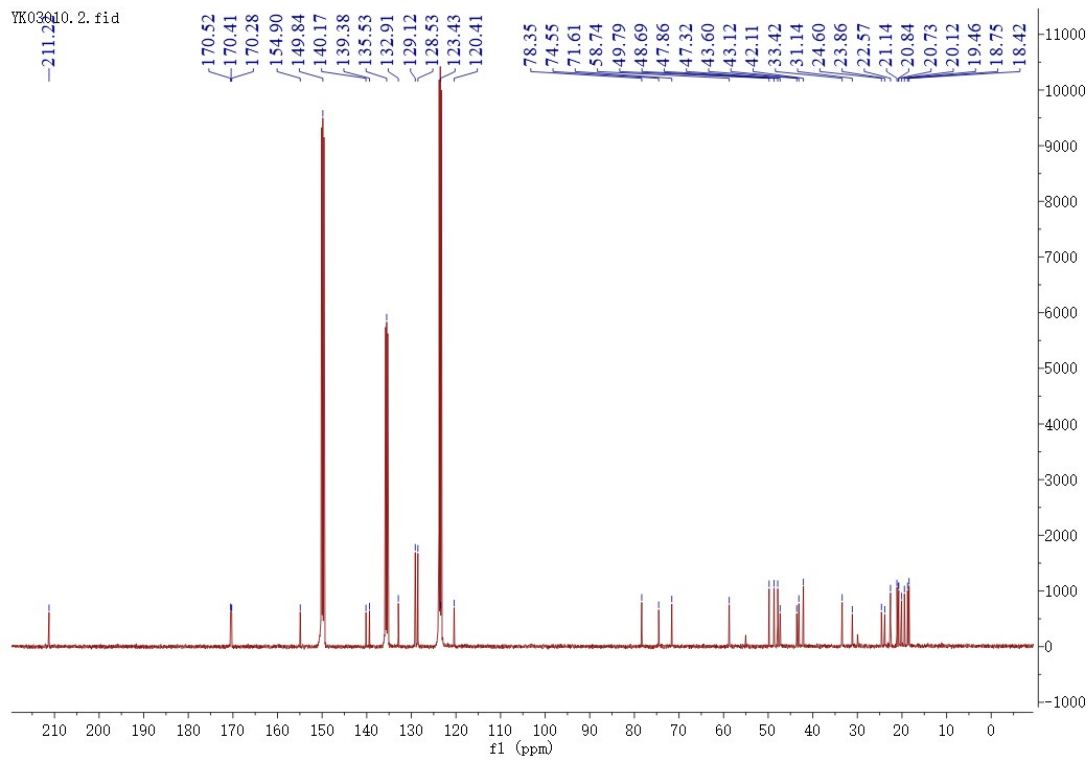

Fig. S14  $^{13}\text{C}$  NMR spectrum of **4c**

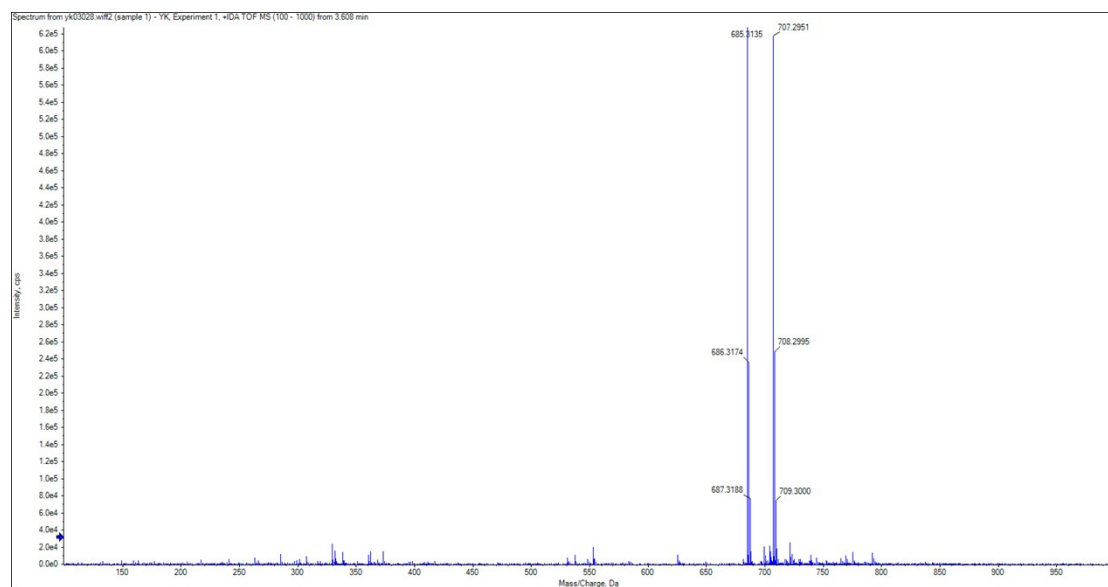

Fig. S15 HRMS spectrum of **4c**



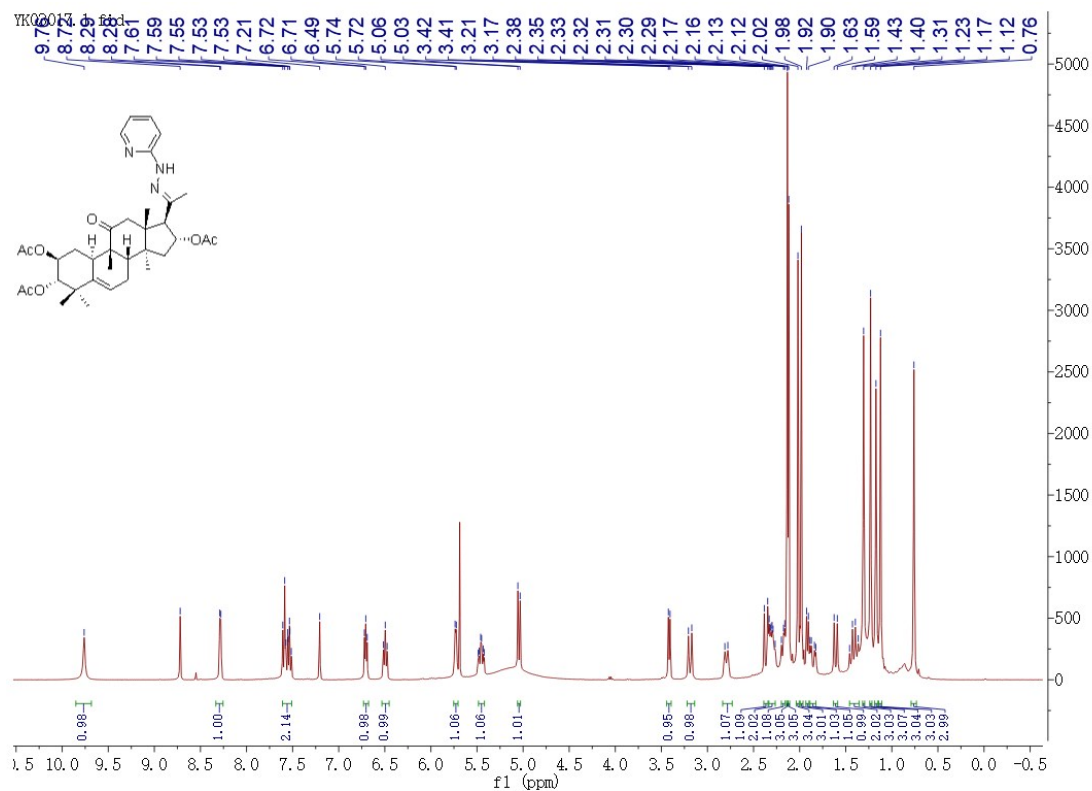

Fig. S16  $^1\text{H}$  NMR spectrum of 4d

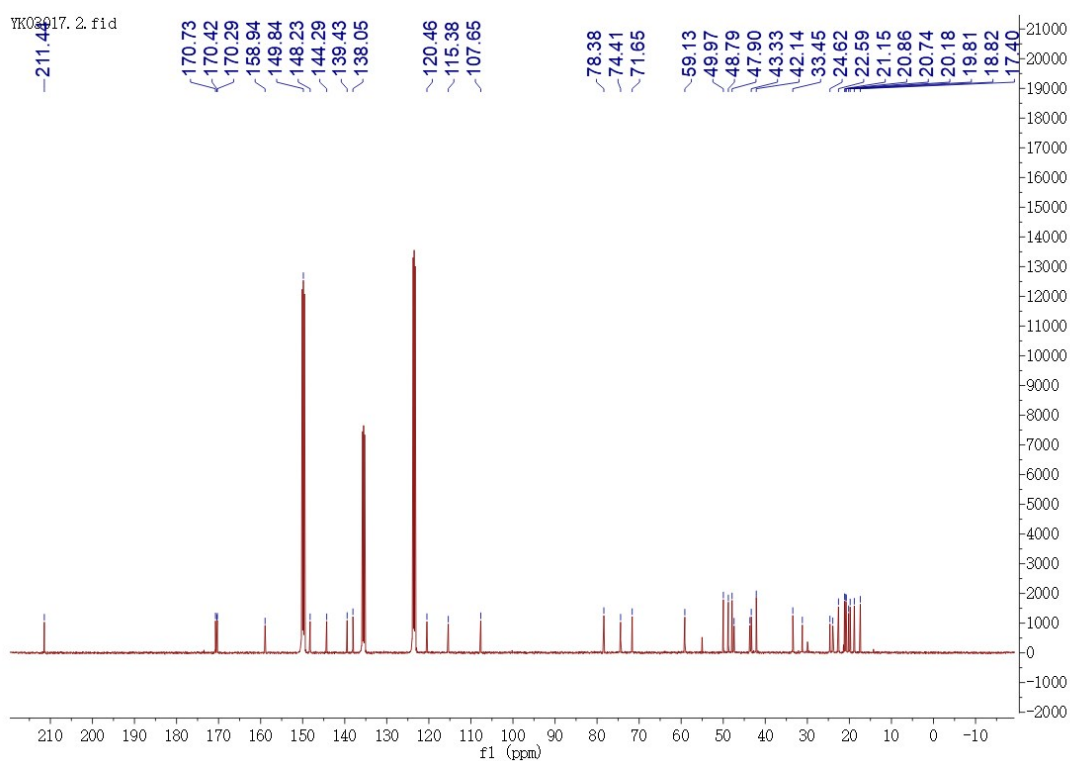

Fig. S17  $^{13}\text{C}$  NMR spectrum of 4d

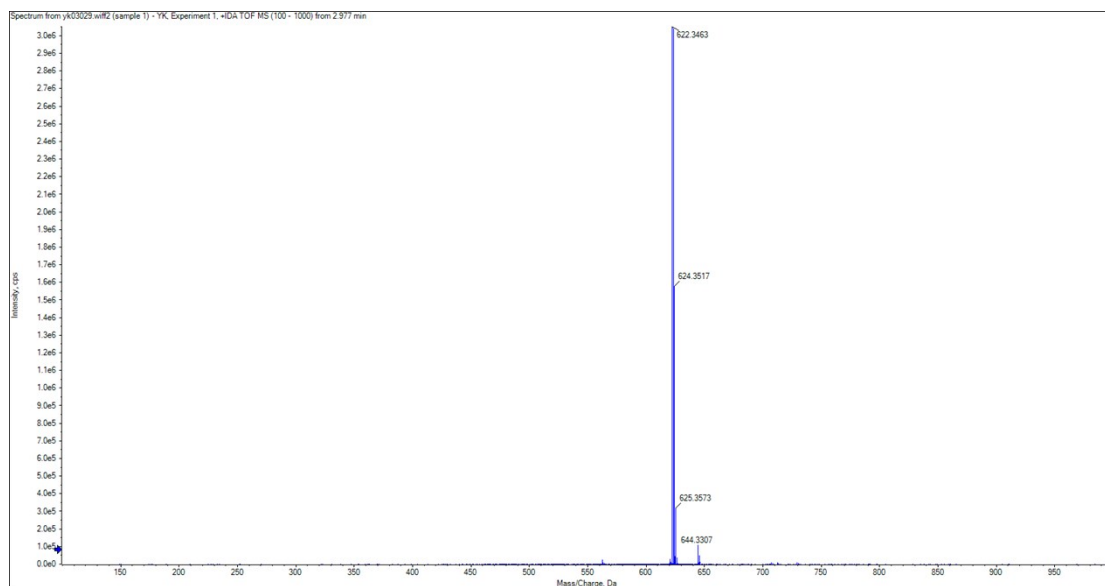

Fig. S18 HRMS spectrum of **4d**

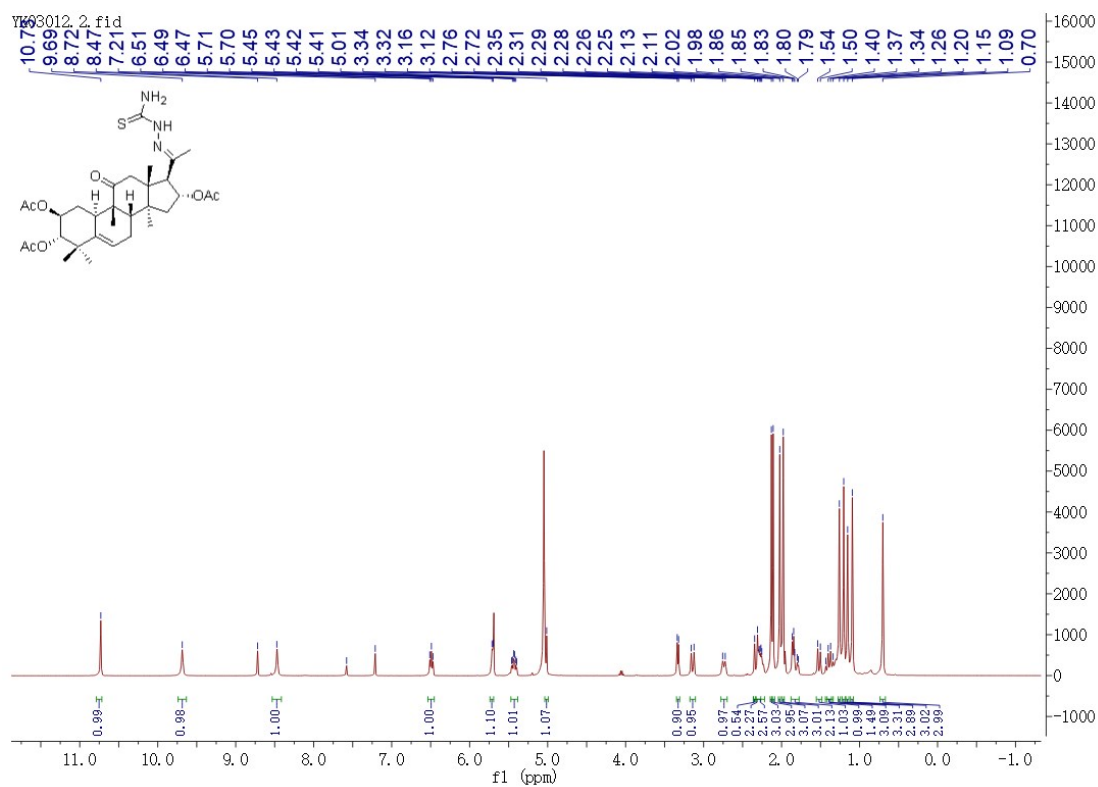

Fig. S19  $^1\text{H}$  NMR spectrum of **4e**

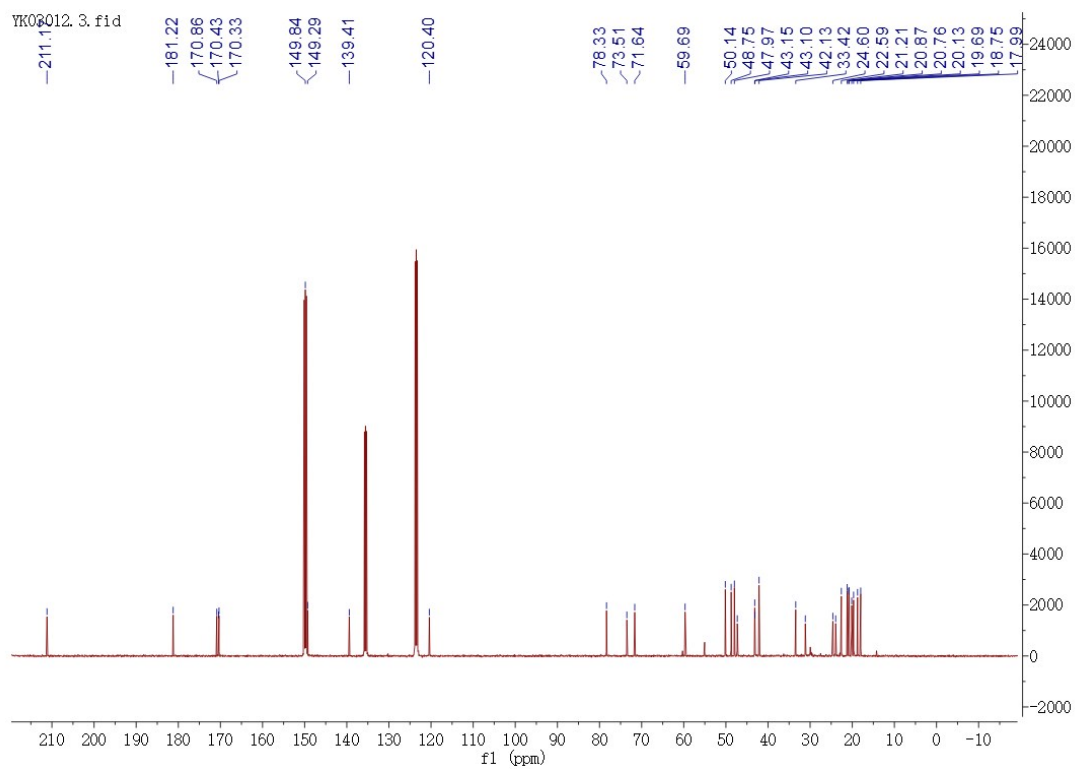

Fig. S20  $^{13}\text{C}$  NMR spectrum of **4e**

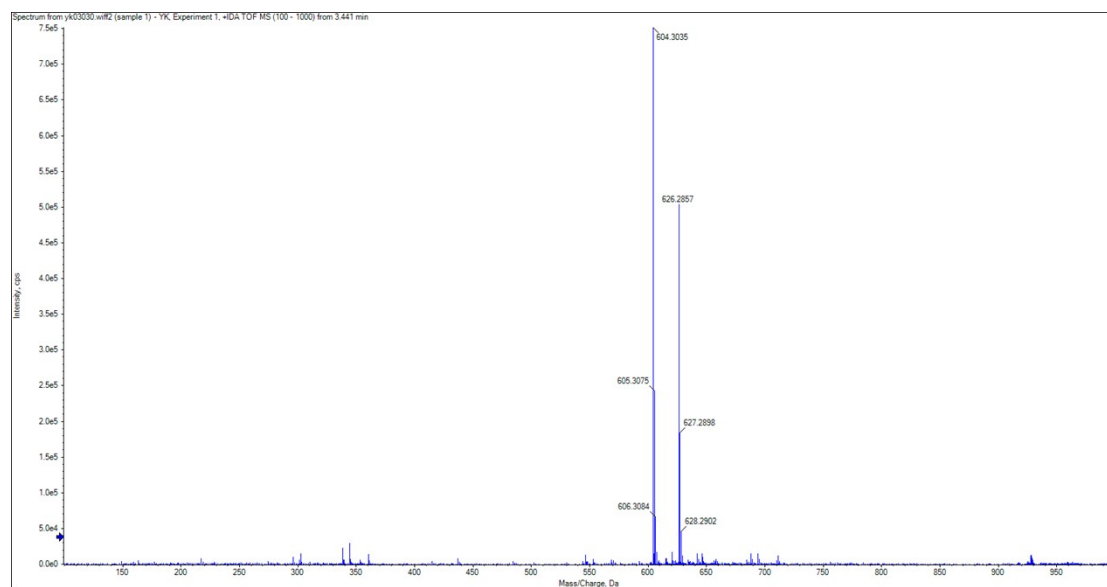

Fig. S21 HRMS spectrum of **4e**

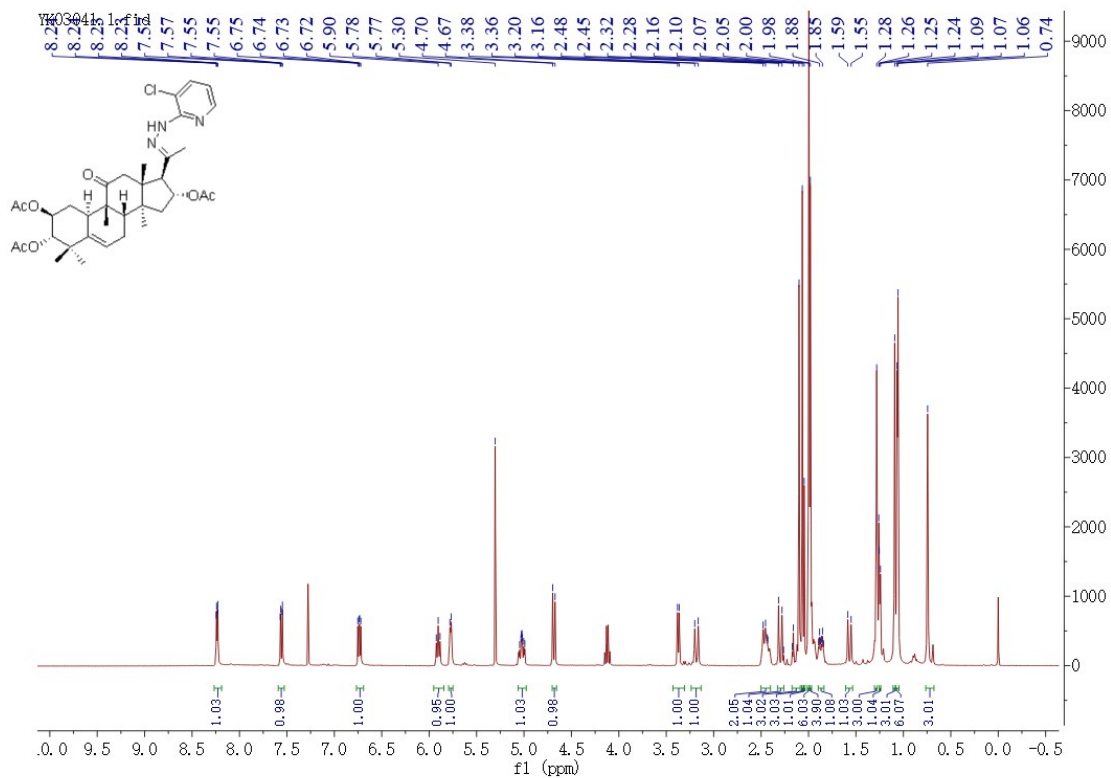

Fig. S22  $^1\text{H}$  NMR spectrum of **4f**

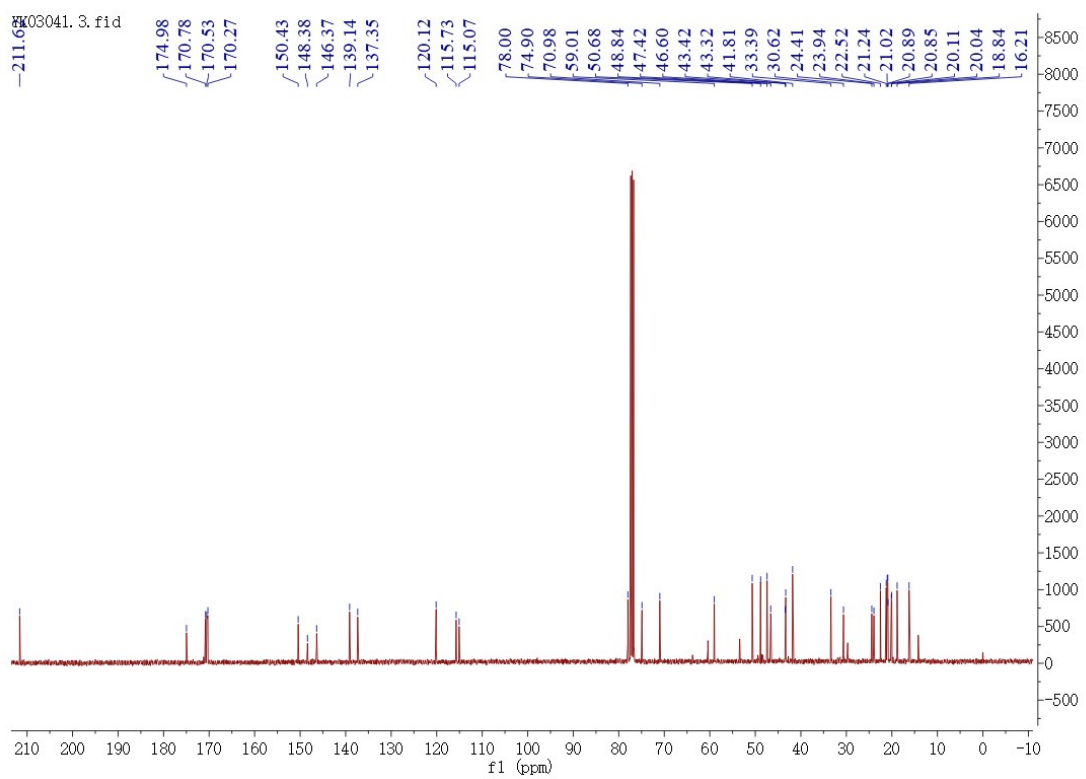

Fig. S23  $^{13}\text{C}$  NMR spectrum of **4f**

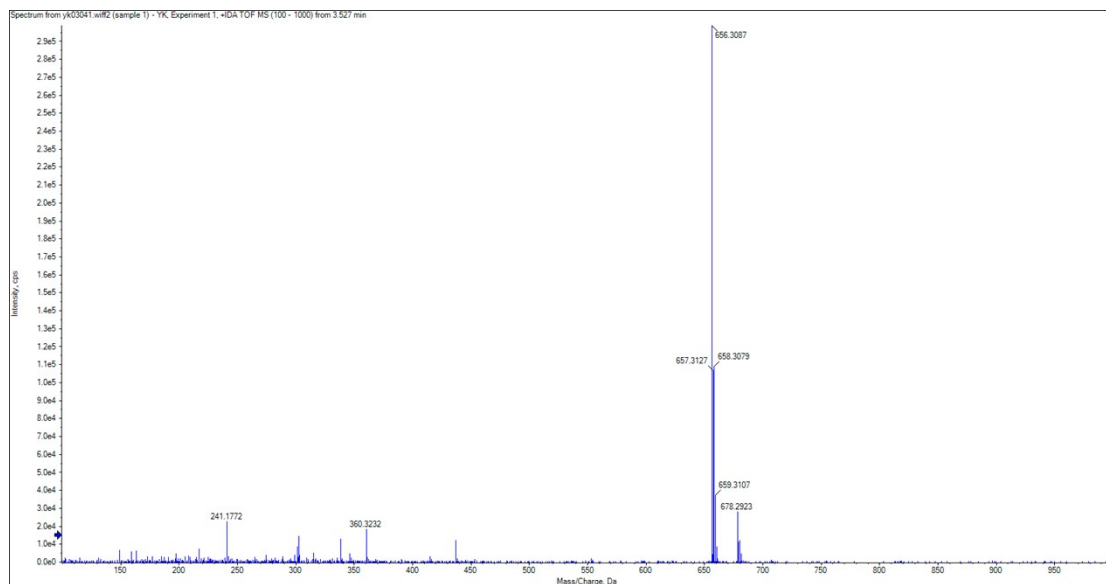

Fig. S24 HRMS spectrum of 4f

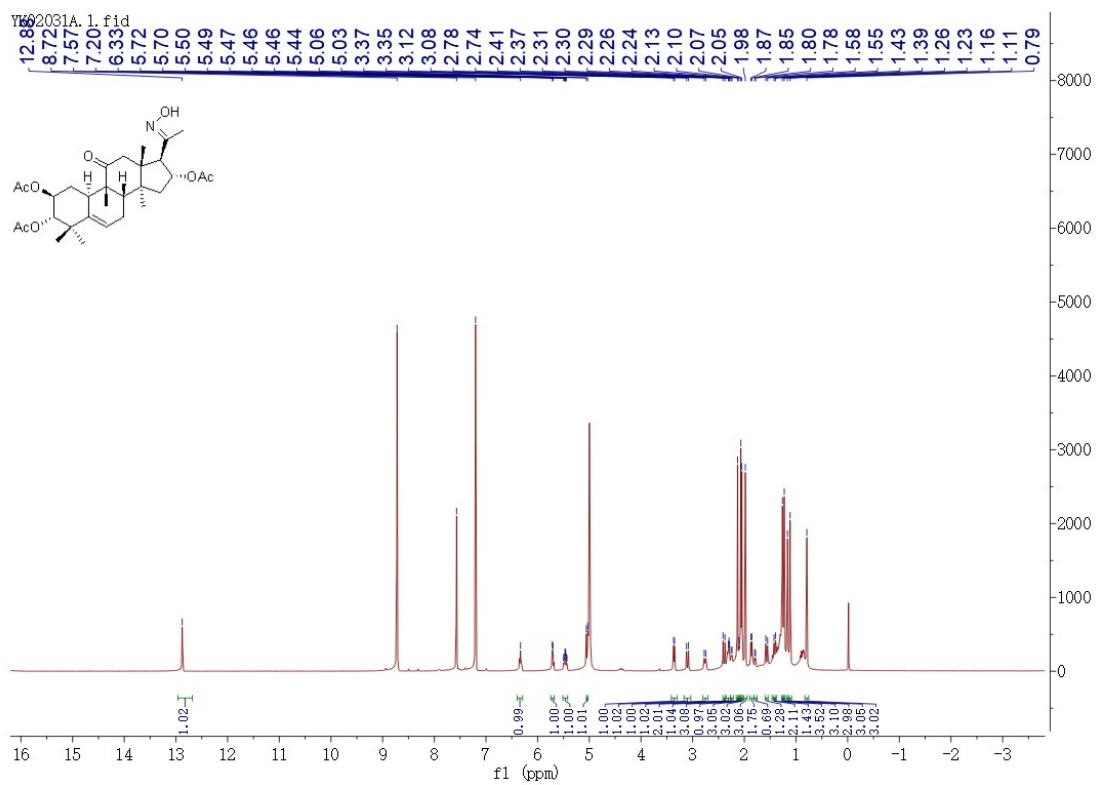

Fig. S25 <sup>1</sup>H NMR spectrum of 5a

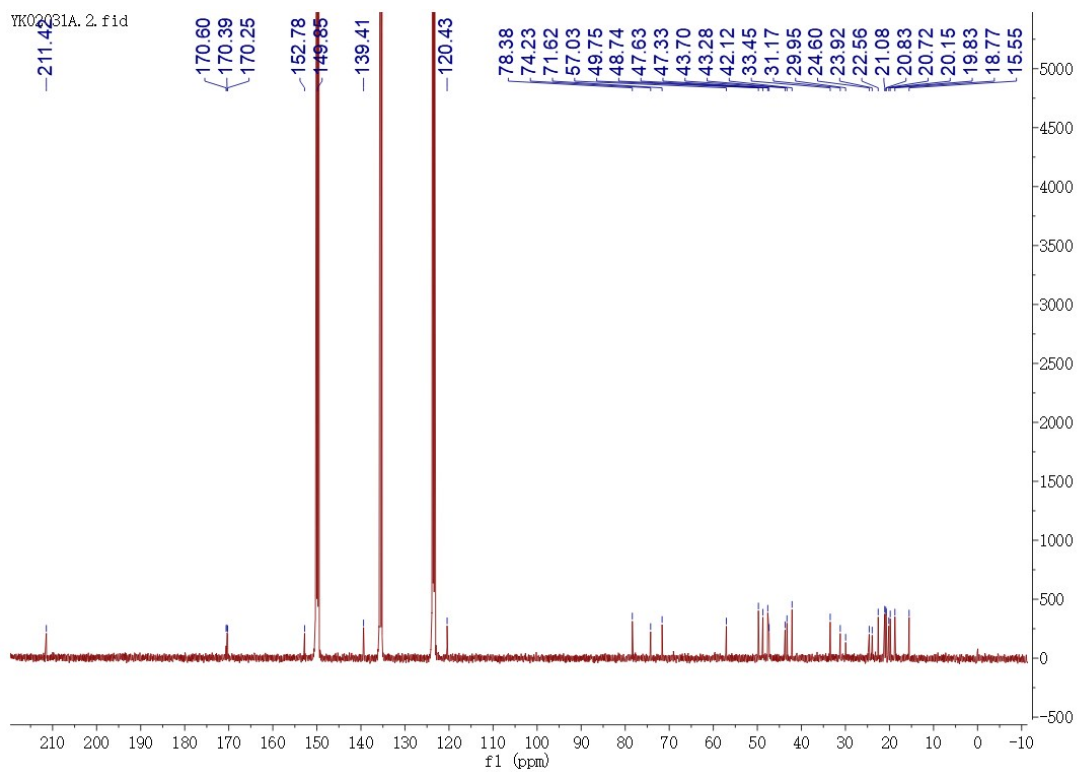

Fig. S26  $^{13}\text{C}$  NMR spectrum of **5a**

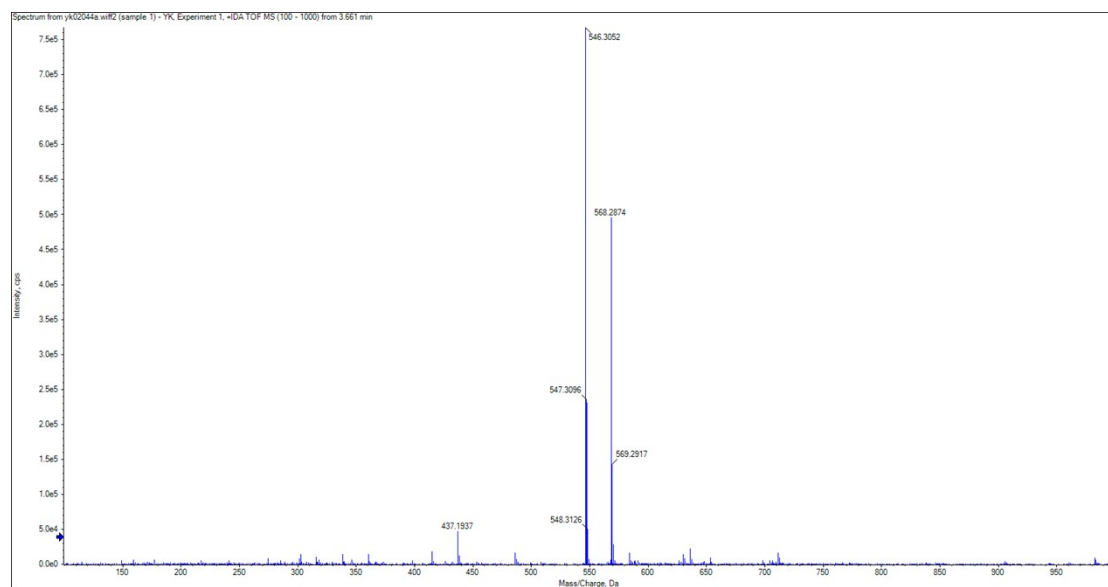

Fig. S27 HRMS spectrum of **5a**



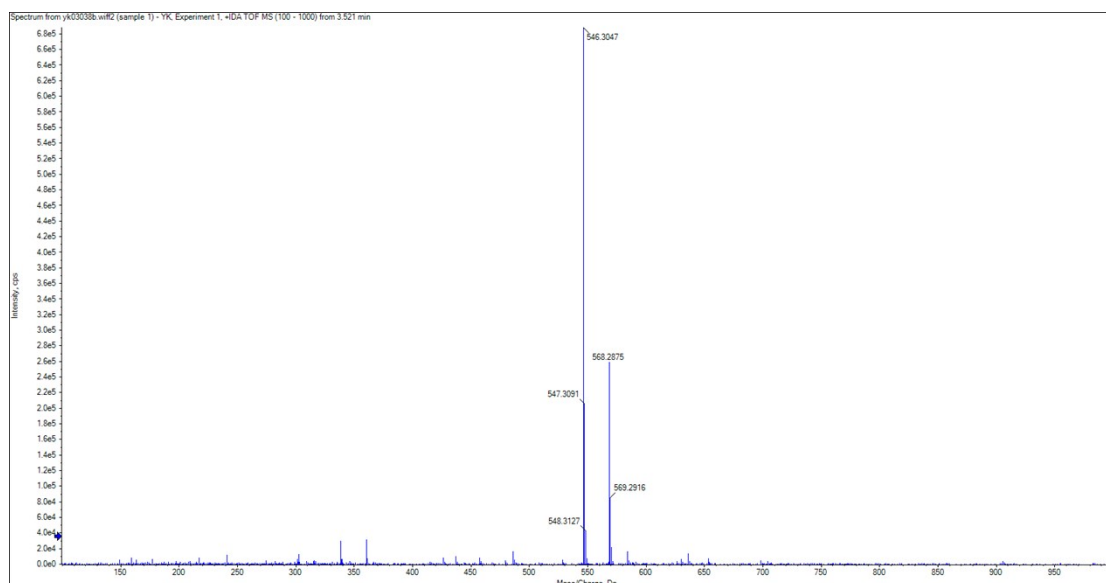

Fig. S30 HRMS spectrum of **5b**

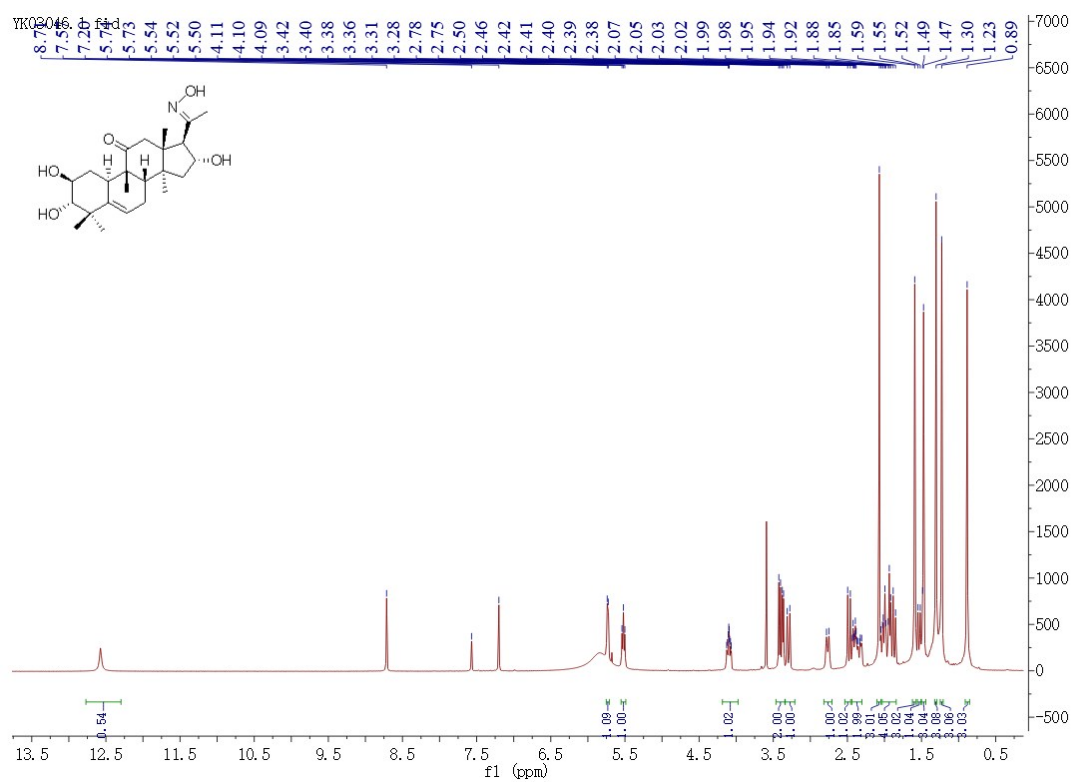

Fig. S31  $^1\text{H}$  NMR spectrum of **6a**



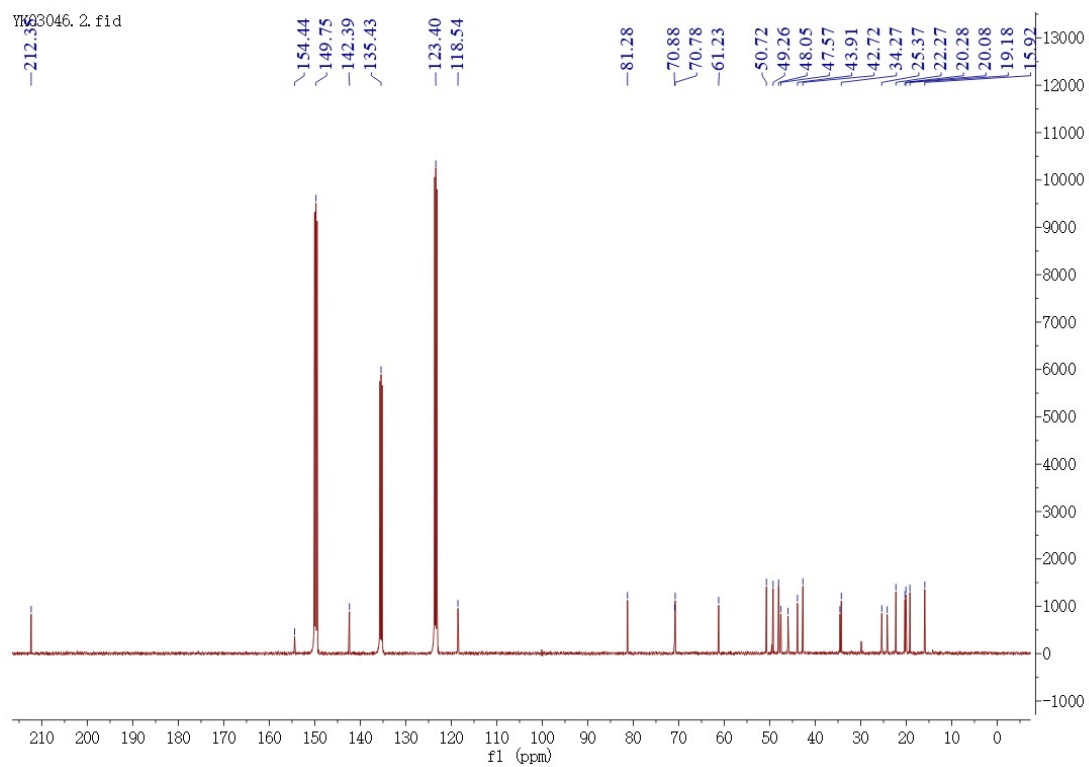

Fig. S32  $^{13}\text{C}$  NMR spectrum of **6a**

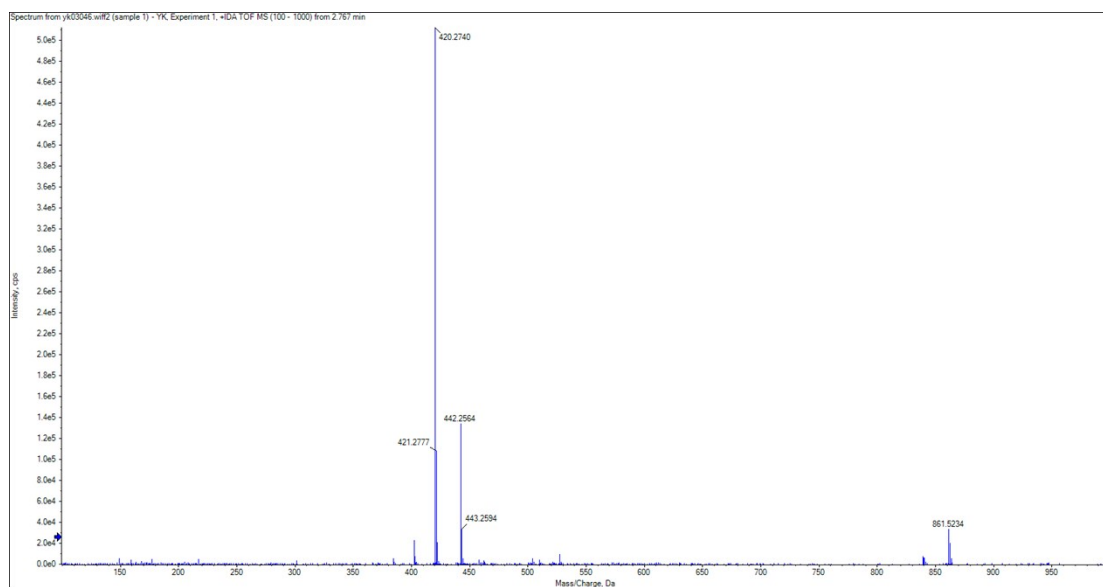

Fig. S33 HRMS spectrum of **6a**

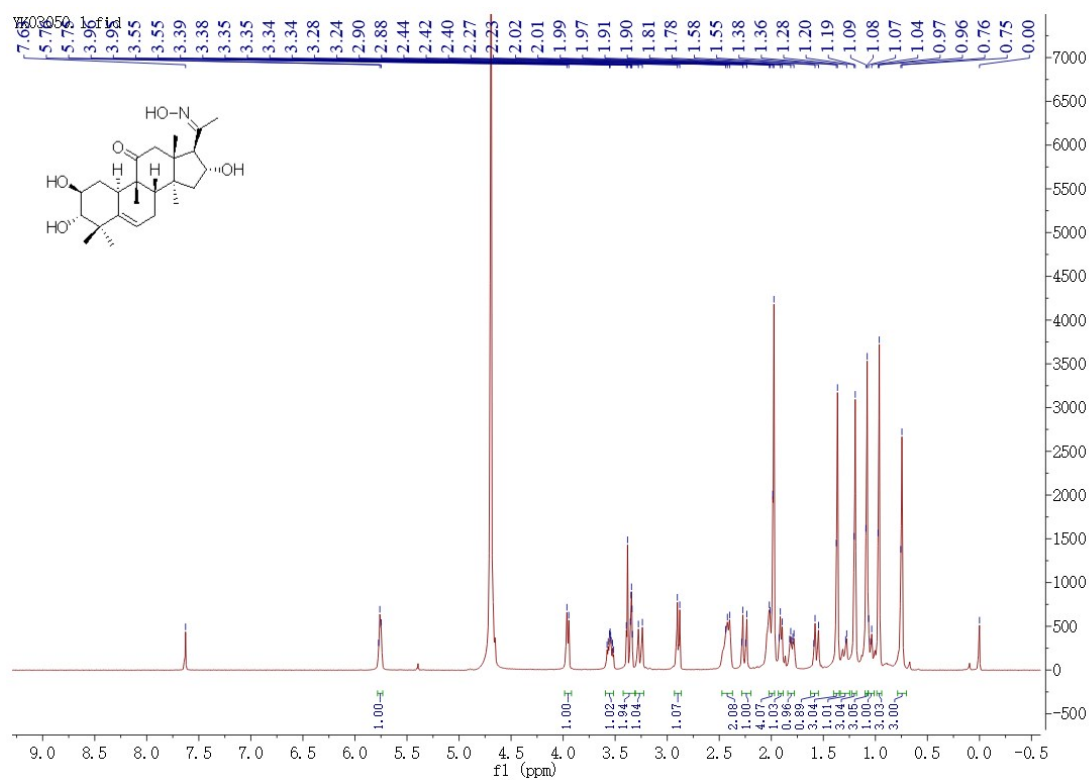

Fig. S34  $^1\text{H}$  NMR spectrum of 6b

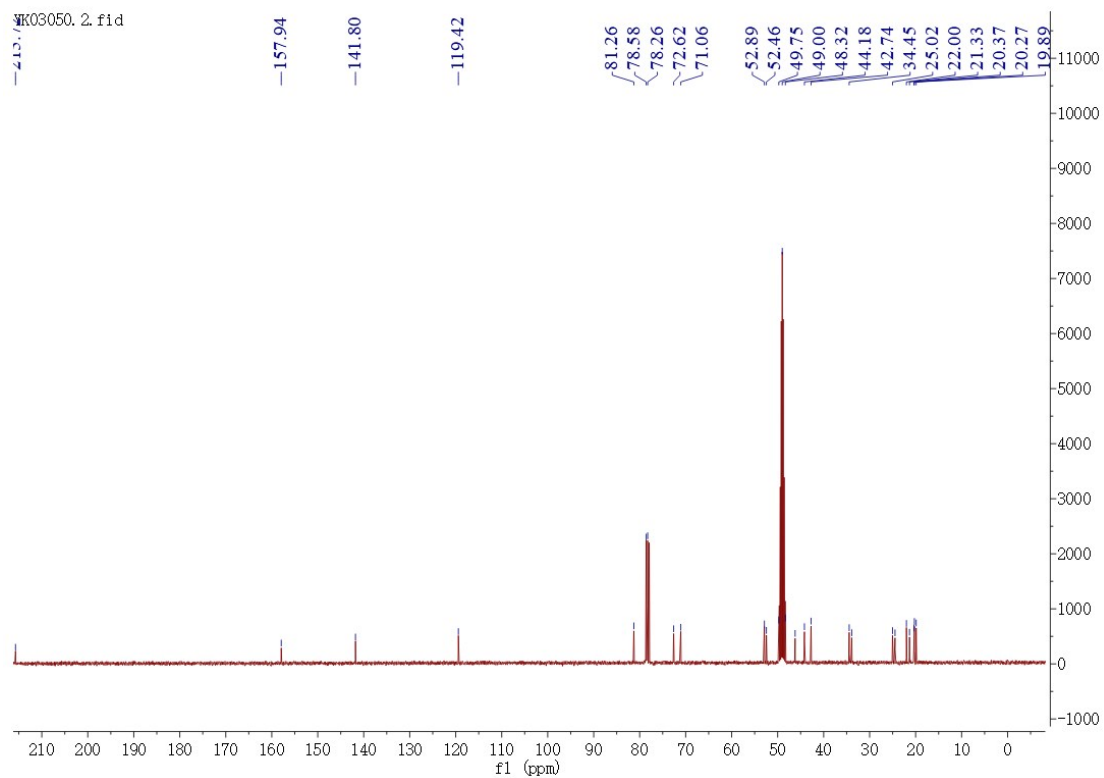

Fig. S35  $^{13}\text{C}$  NMR spectrum of 6b

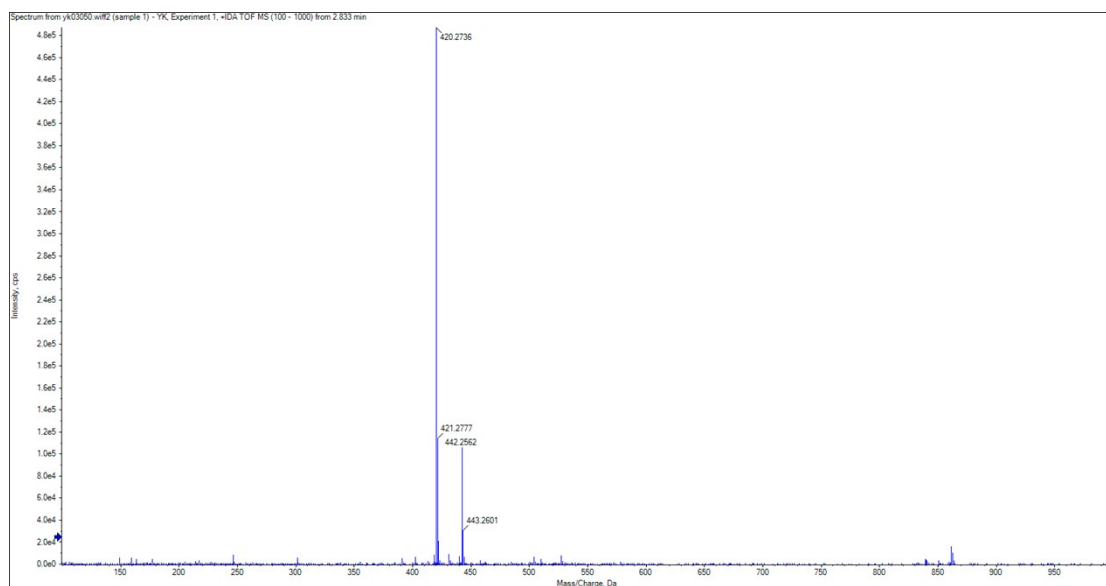

Fig. S36 HRMS spectrum of **6b**

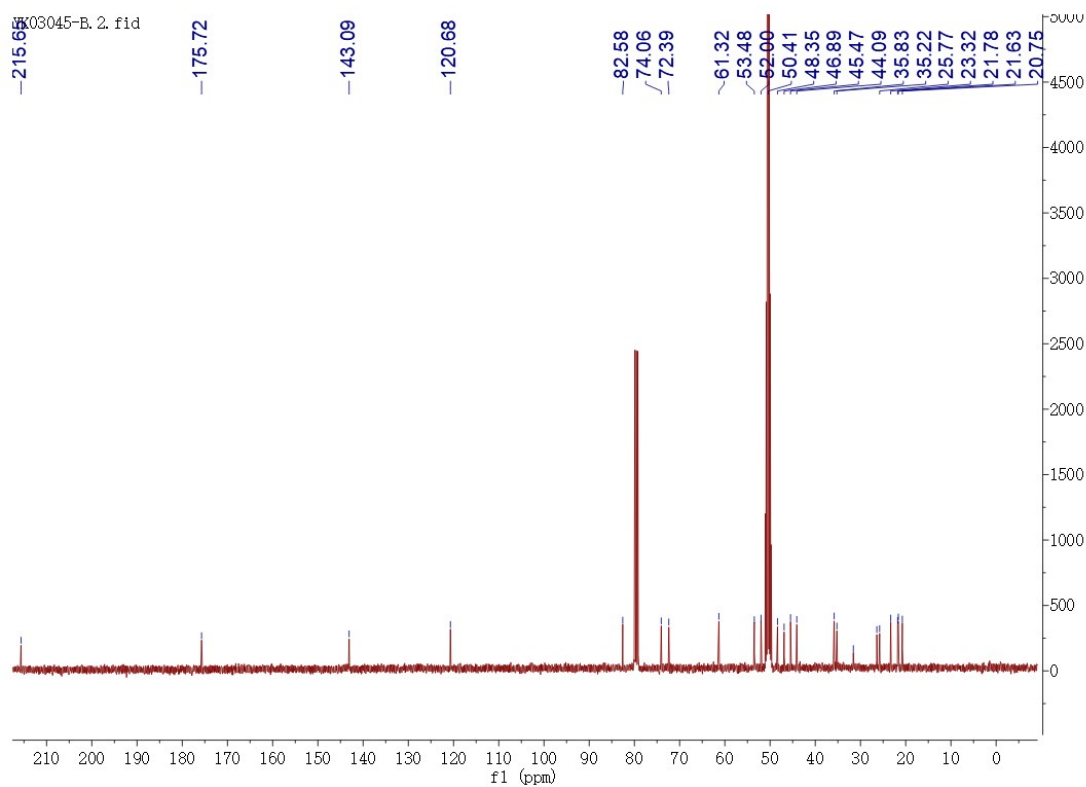

Fig. S37  $^{13}\text{C}$  NMR spectrum of **7**

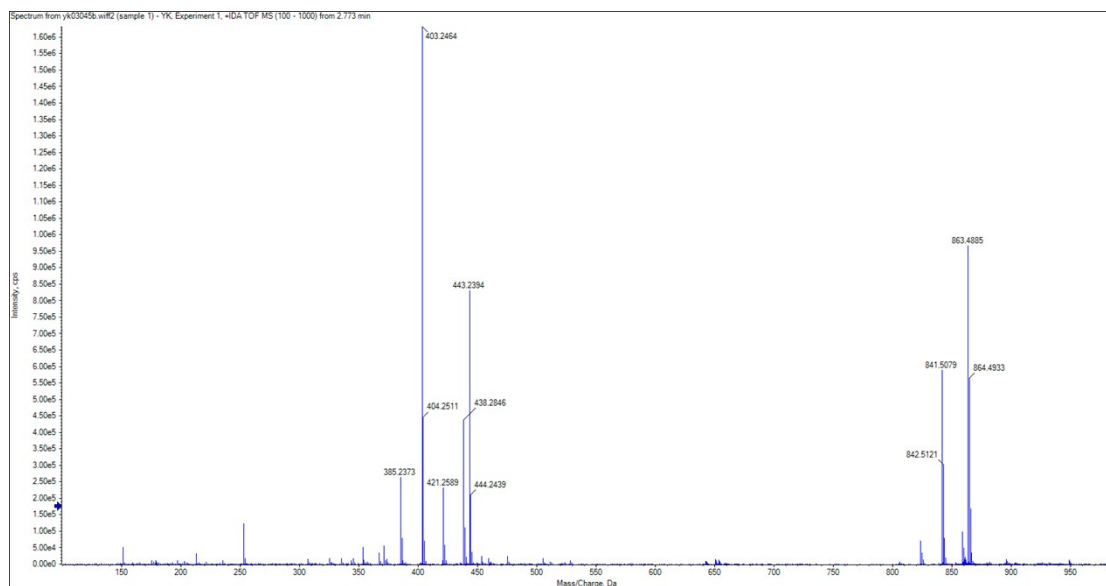

Fig. S38 HRMS spectrum of 7

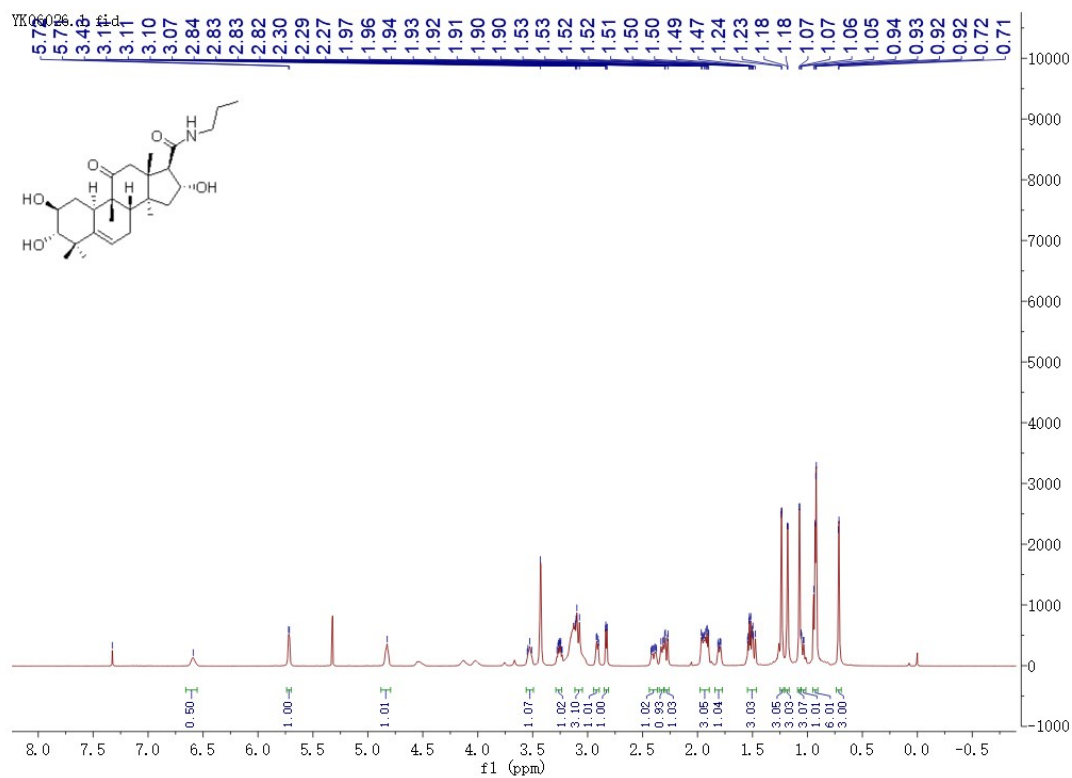

Fig. S39 <sup>1</sup>H NMR spectrum of 9a

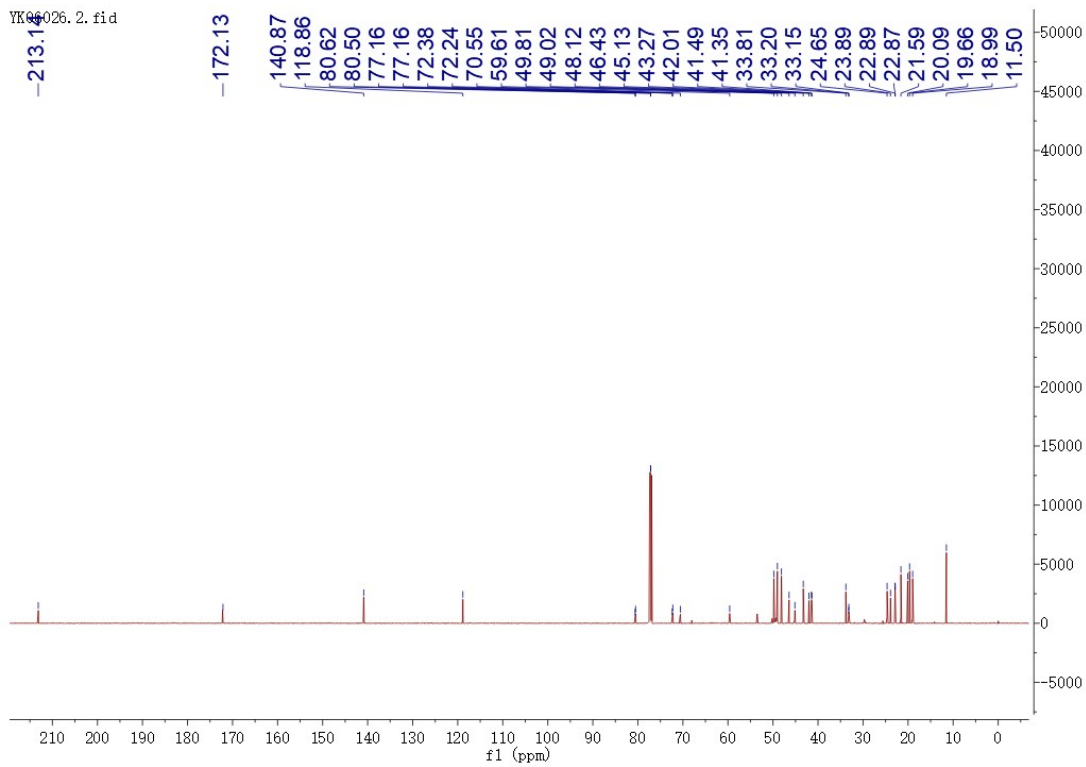

Fig. S40  $^{13}\text{C}$  NMR spectrum of **9a**

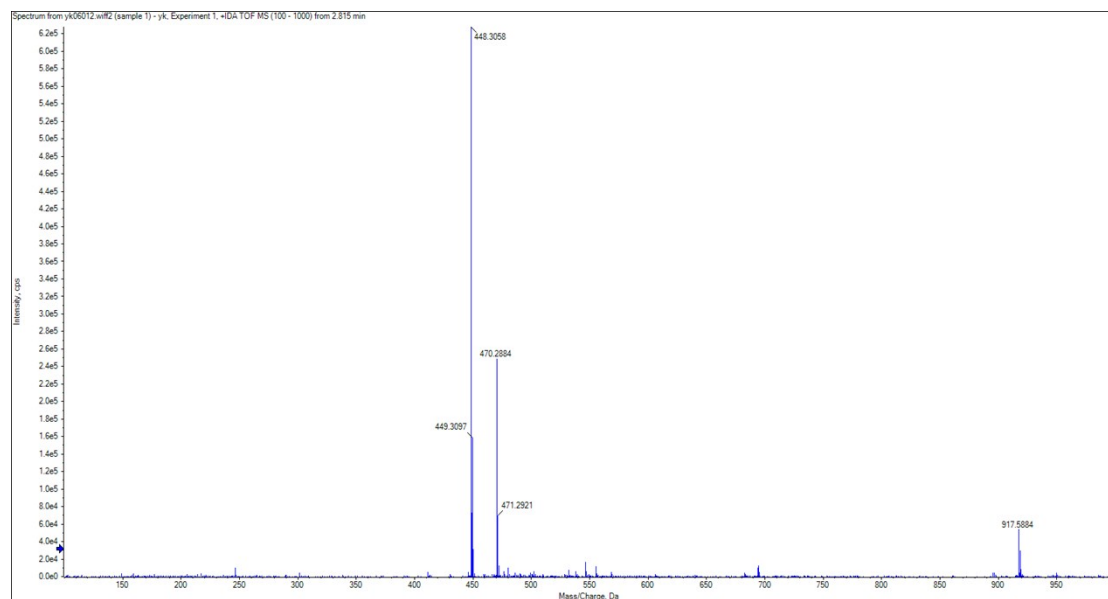

Fig. S41 HRMS spectrum of **9a**

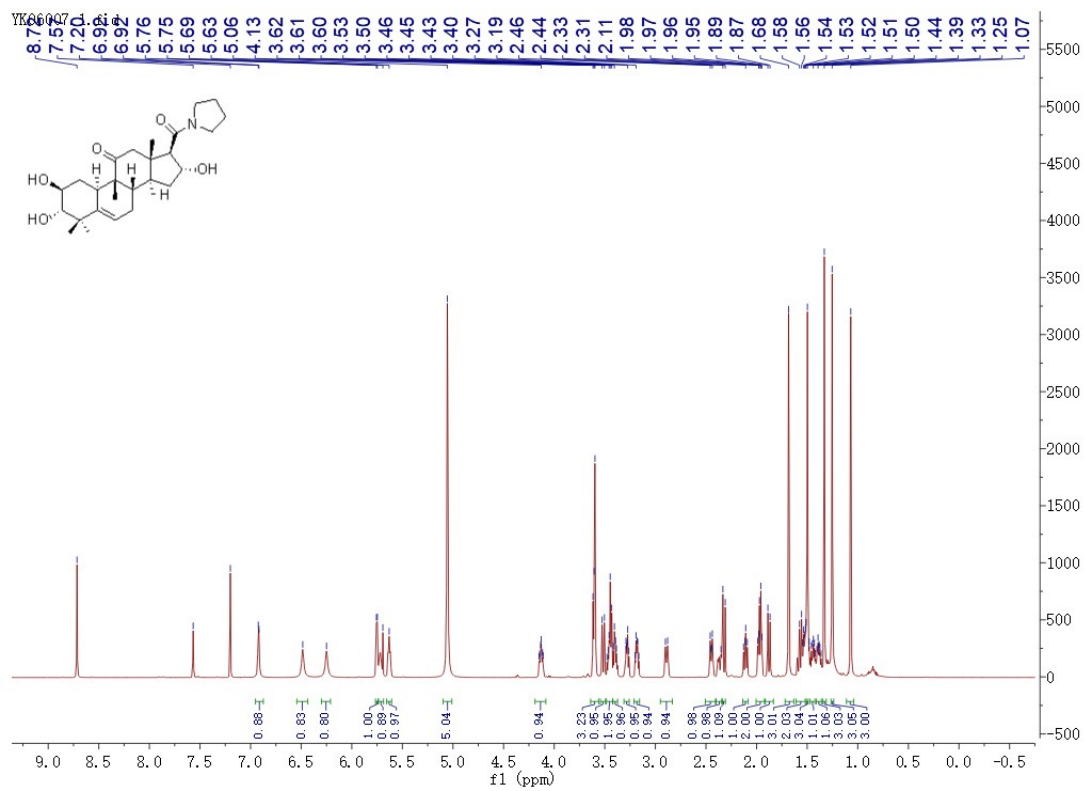

Fig. S42  $^1\text{H}$  NMR spectrum of 9b

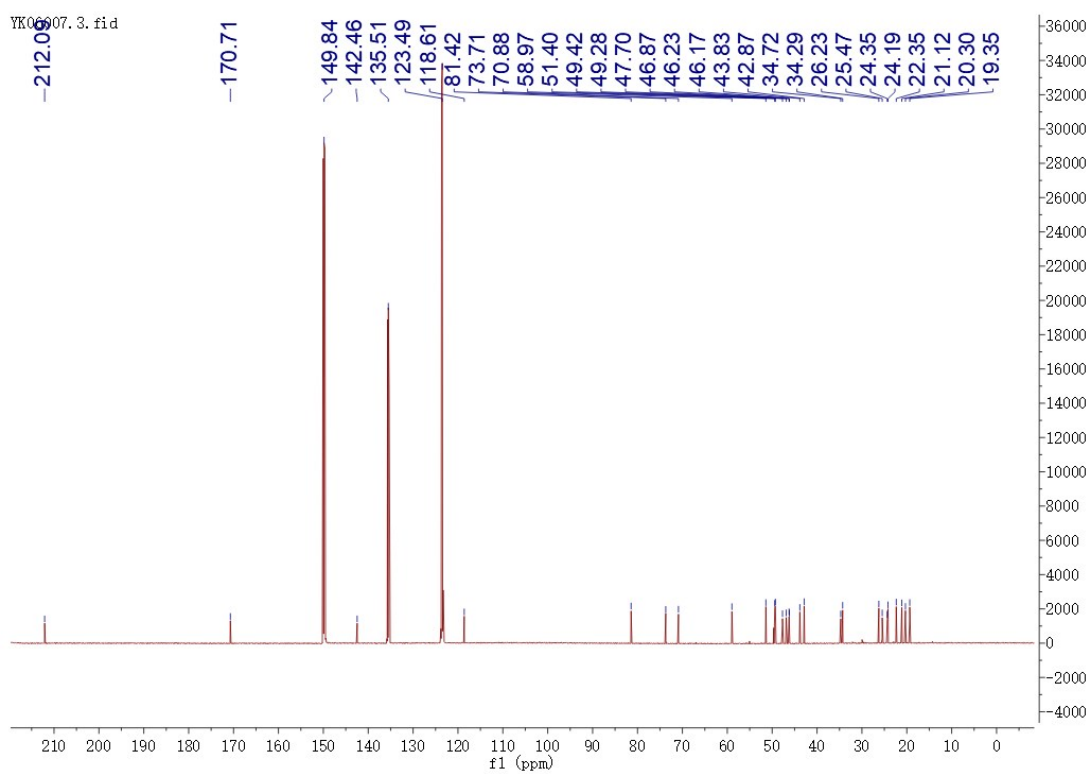

Fig. S43  $^{13}\text{C}$  NMR spectrum of 9b

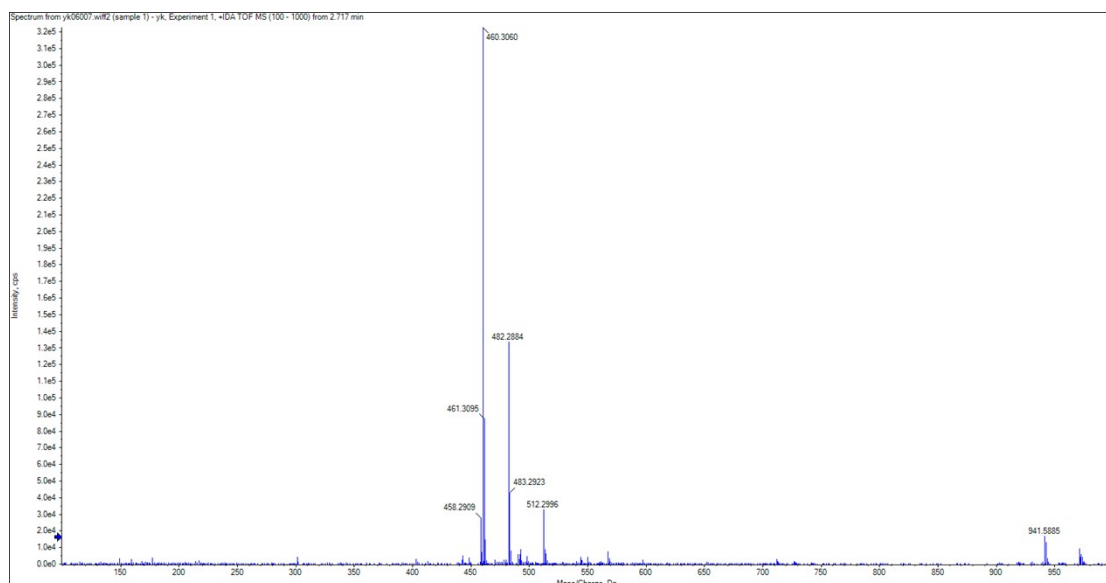

Fig. S44 HRMS spectrum of 9b

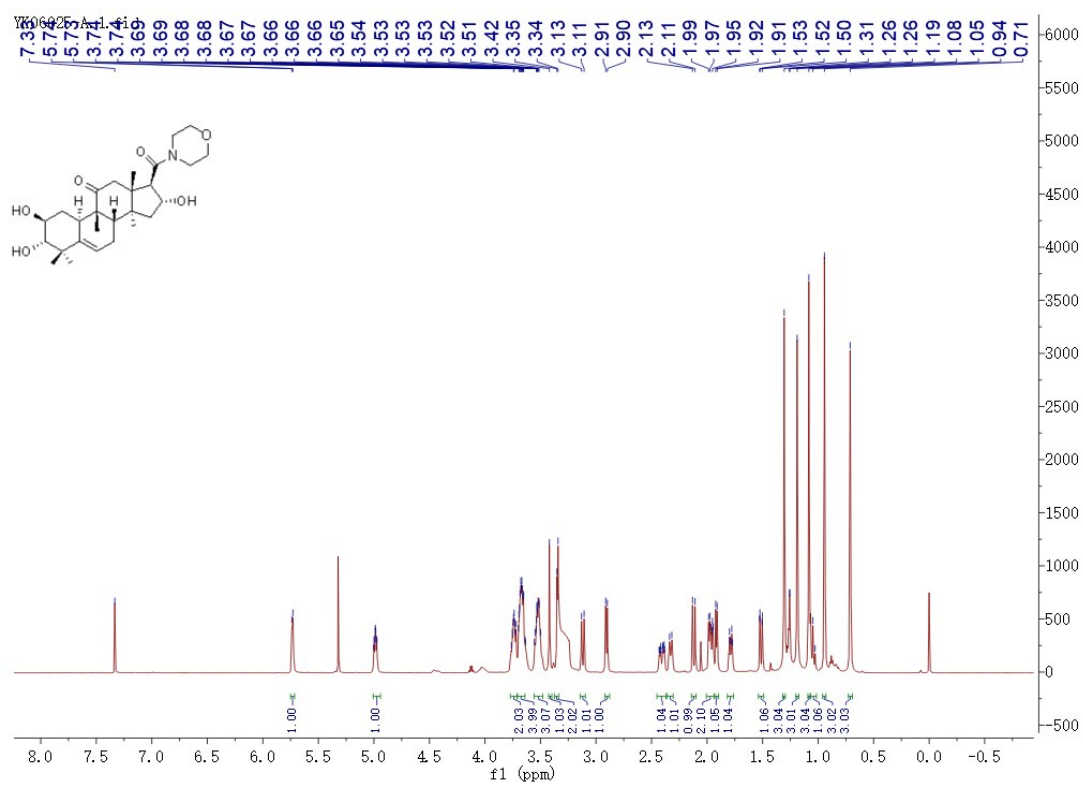

Fig. S45 <sup>1</sup>H NMR spectrum of 9c

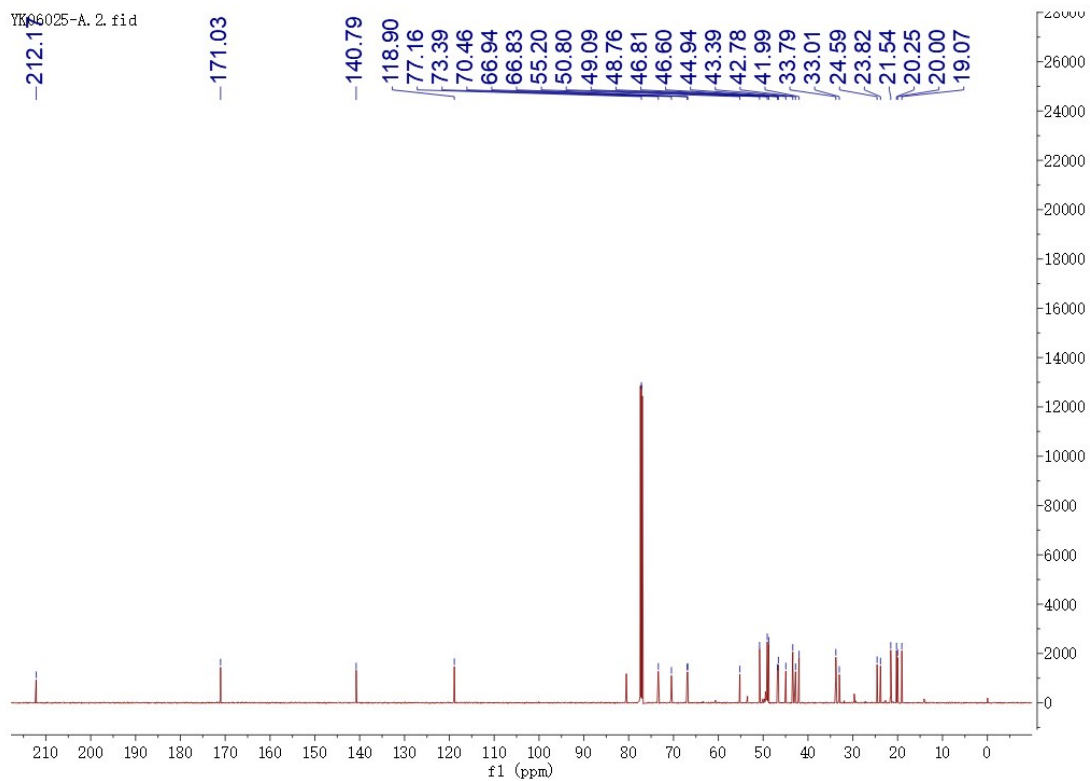

Fig. S46  $^{13}\text{C}$  NMR spectrum of **9c**

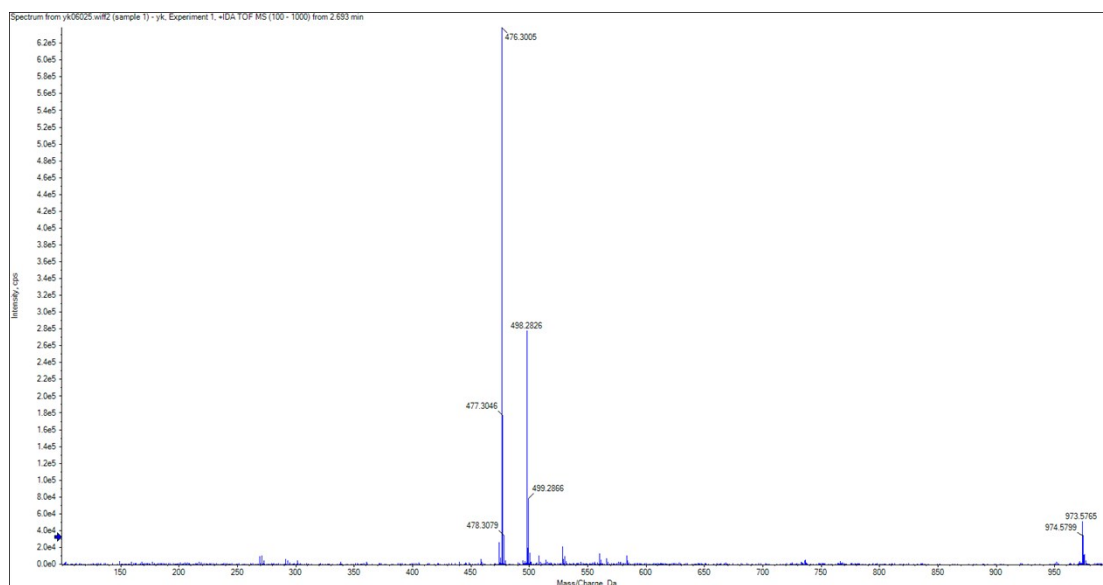

Fig. S47 HRMS spectrum of **9c**



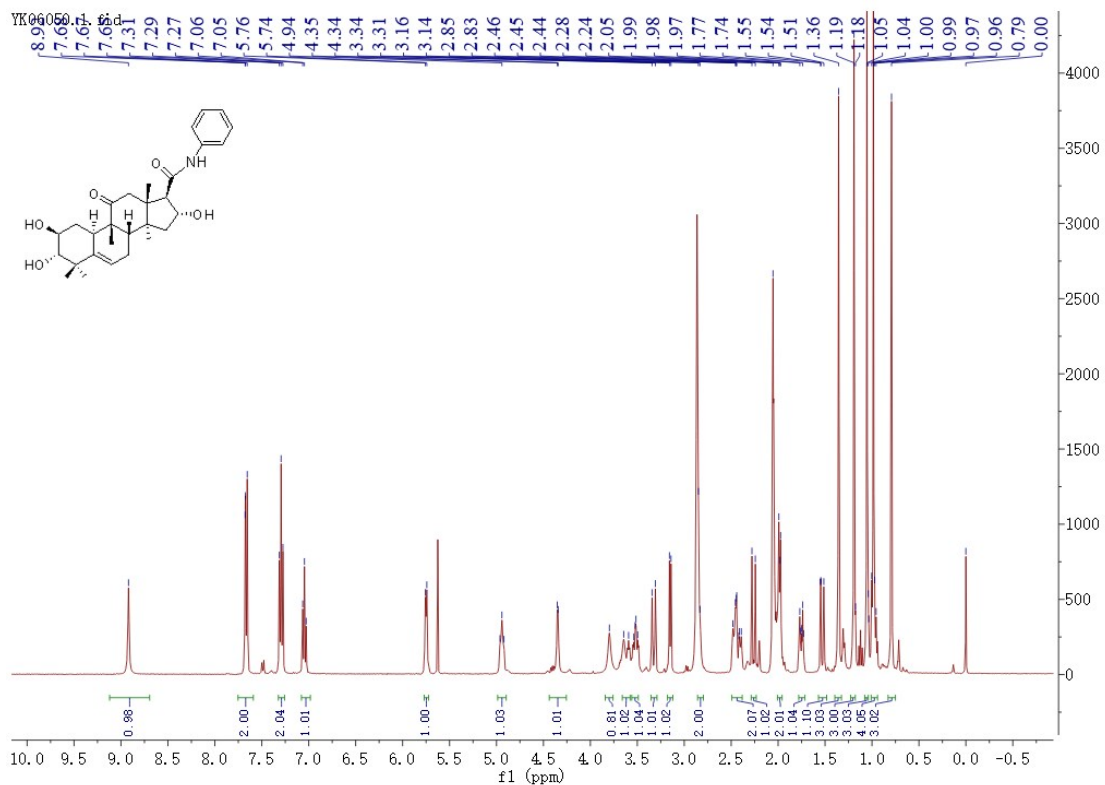

Fig. S48 <sup>1</sup>H NMR spectrum of 9d

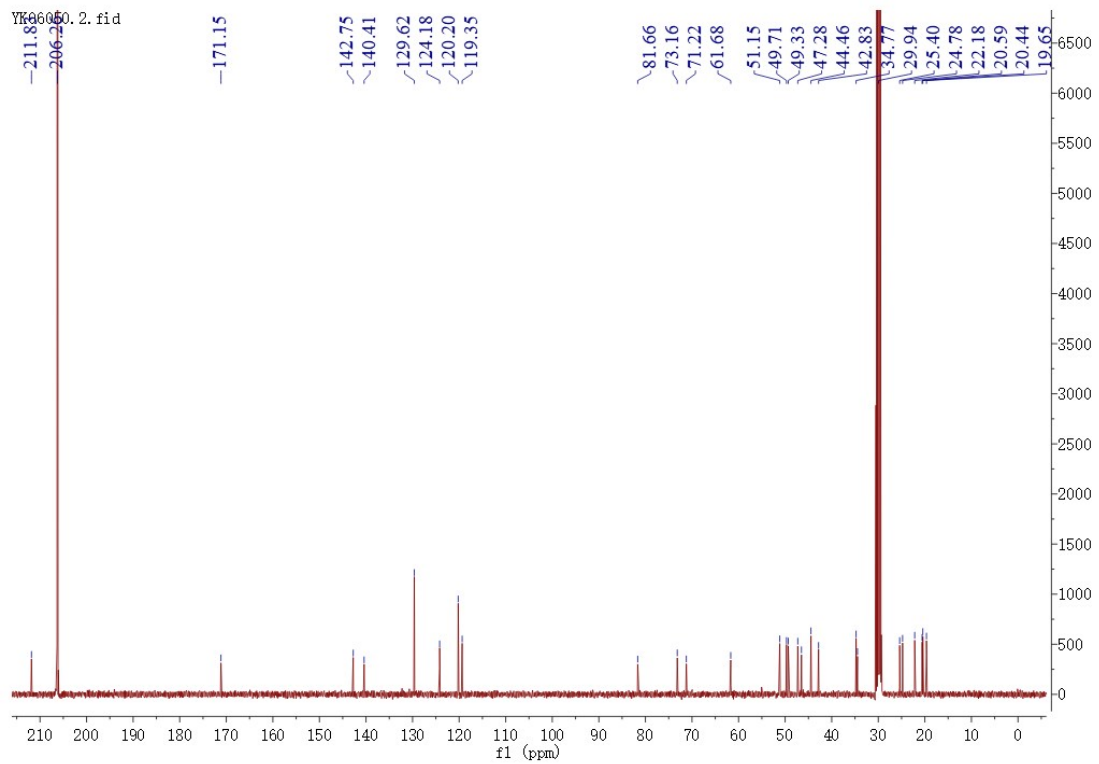

Fig. S49 <sup>13</sup>C NMR spectrum of 9d

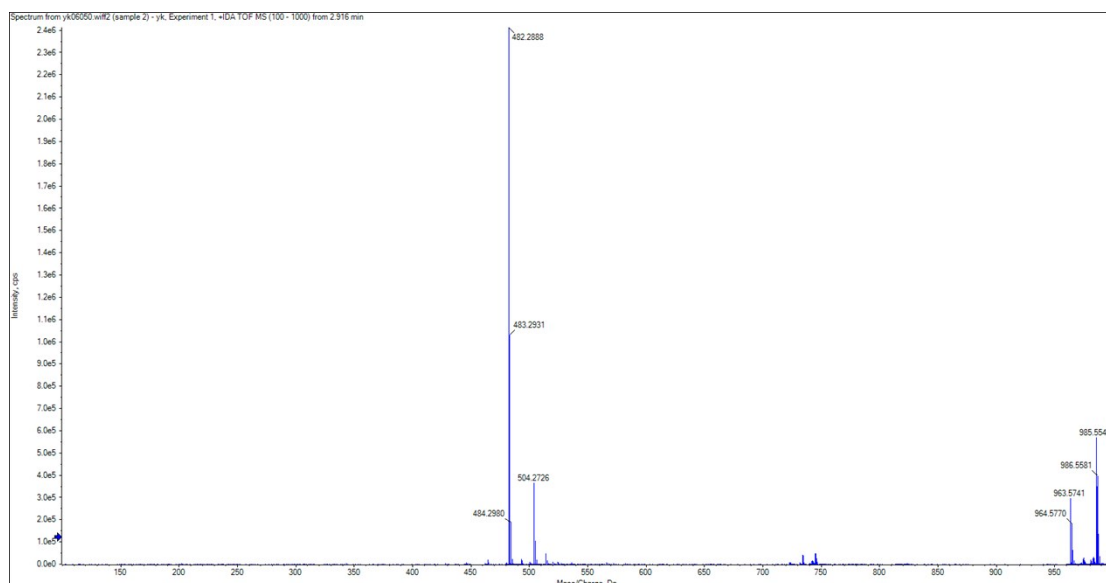

Fig. S50 HRMS spectrum of 9d

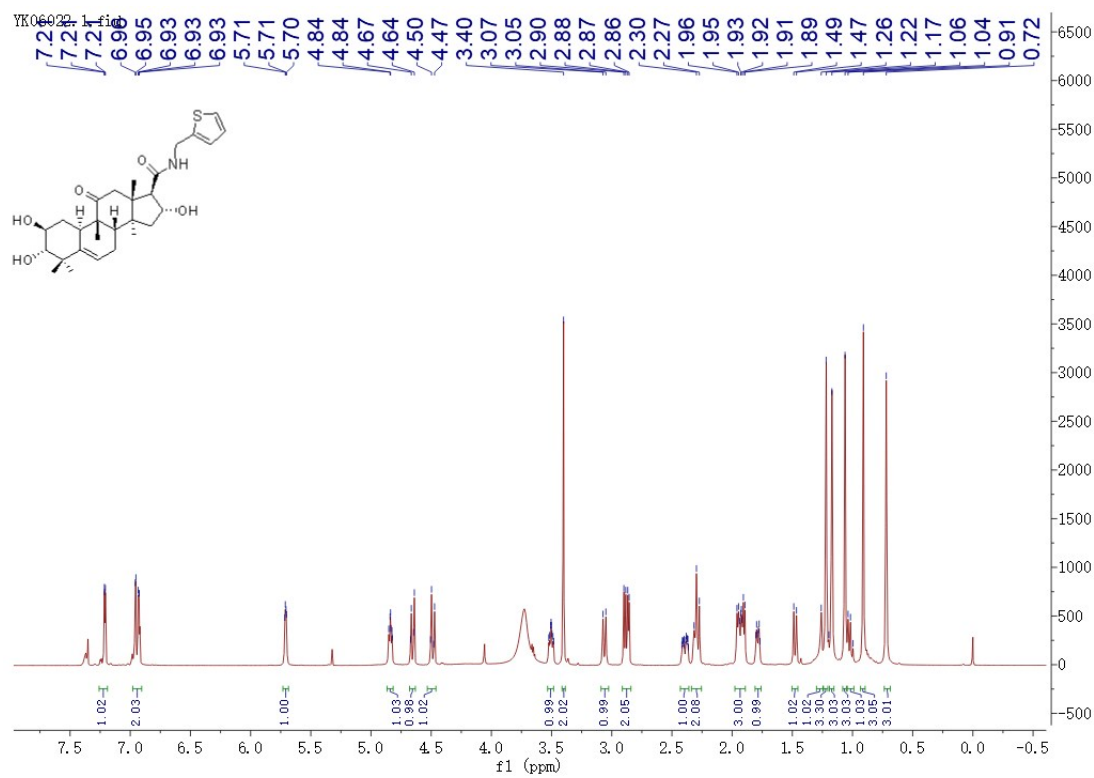

Fig. S51 <sup>1</sup>H NMR spectrum of 9e

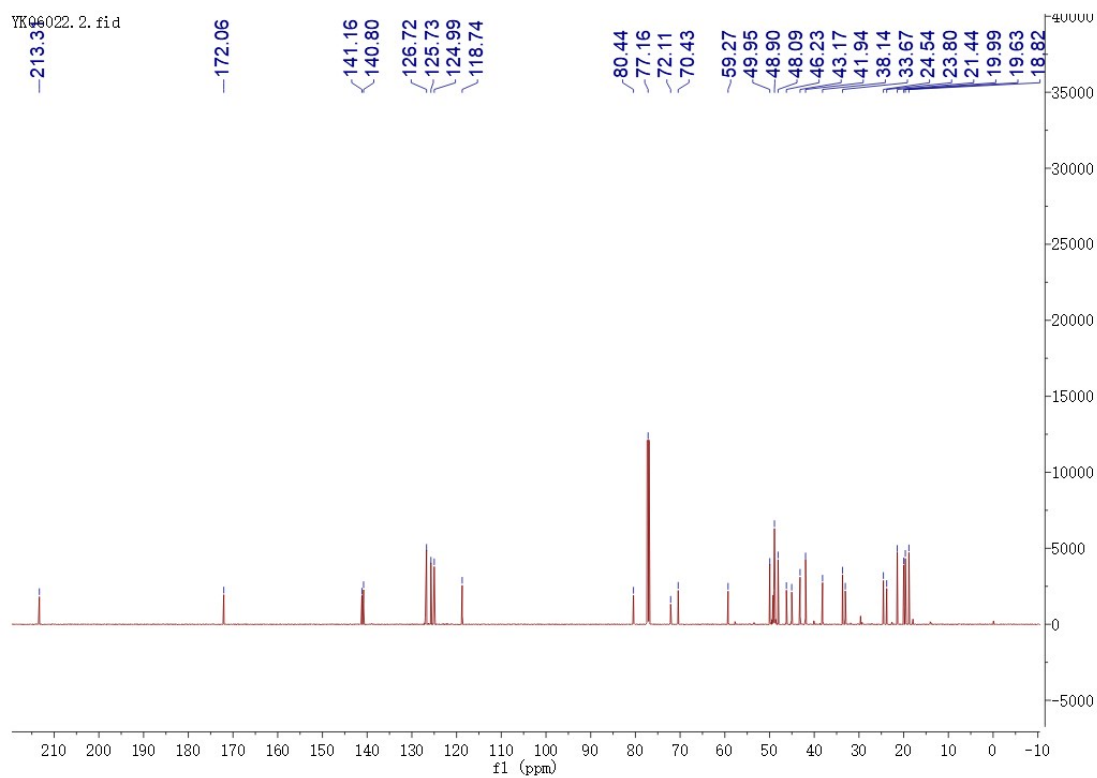

Fig. S52 <sup>13</sup>C NMR spectrum of 9e

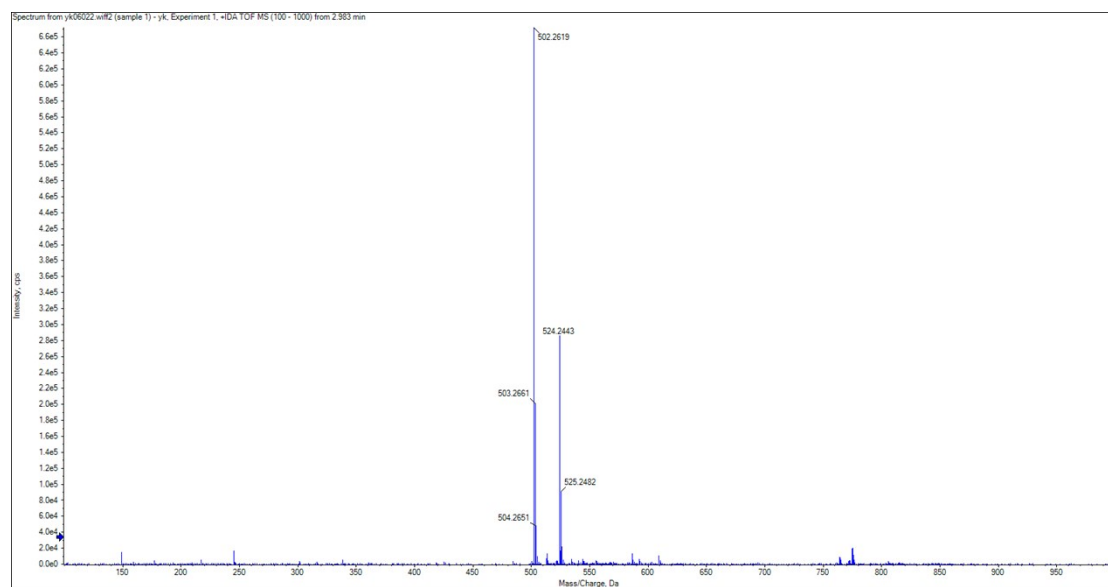

Fig. S53 HRMS spectrum of 9e

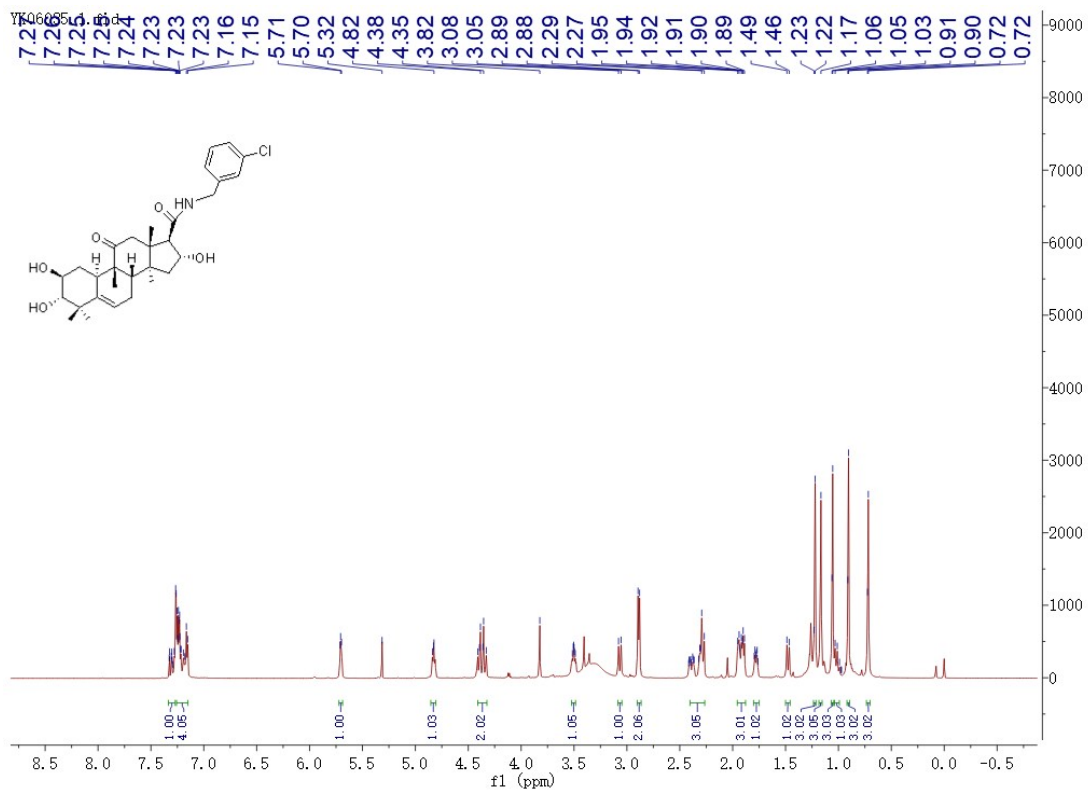

Fig. S54  $^1\text{H}$  NMR spectrum of 9f

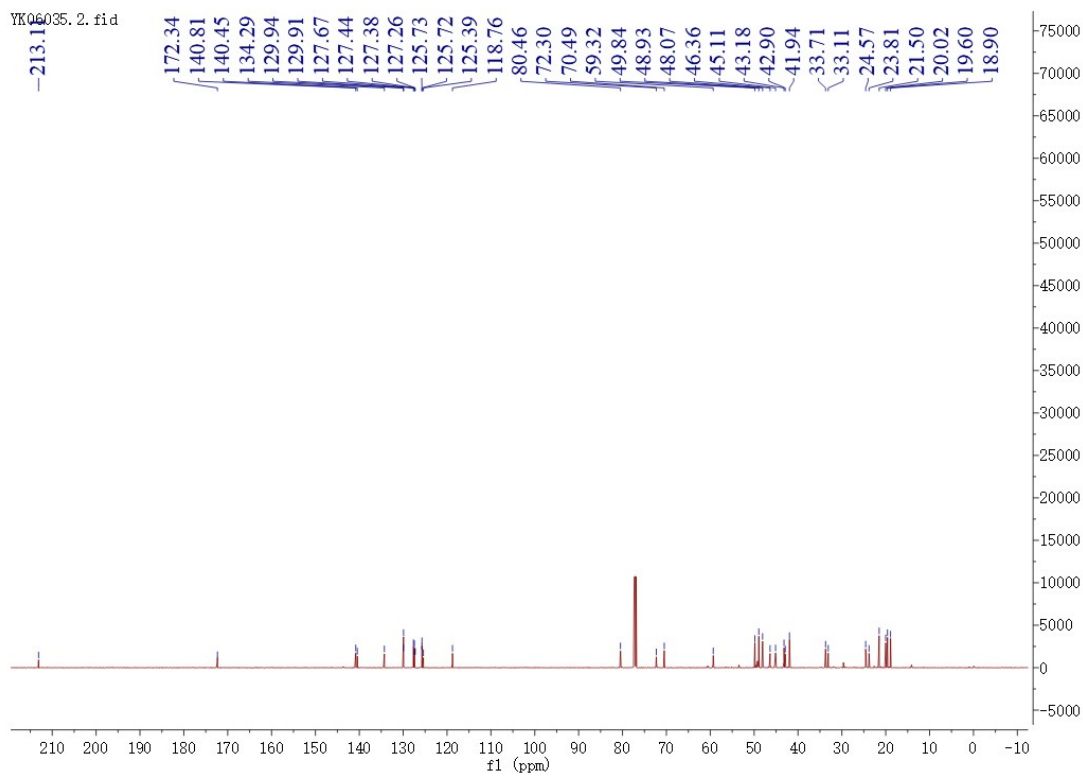

Fig. S55  $^{13}\text{C}$  NMR spectrum of 9f

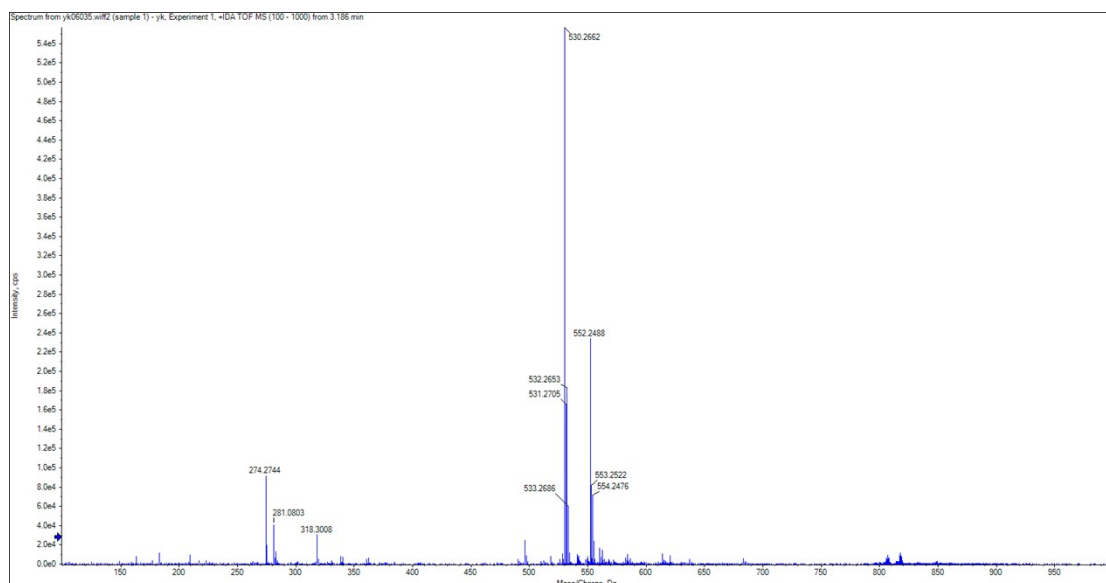

Fig. S56 HRMS spectrum of **9f**

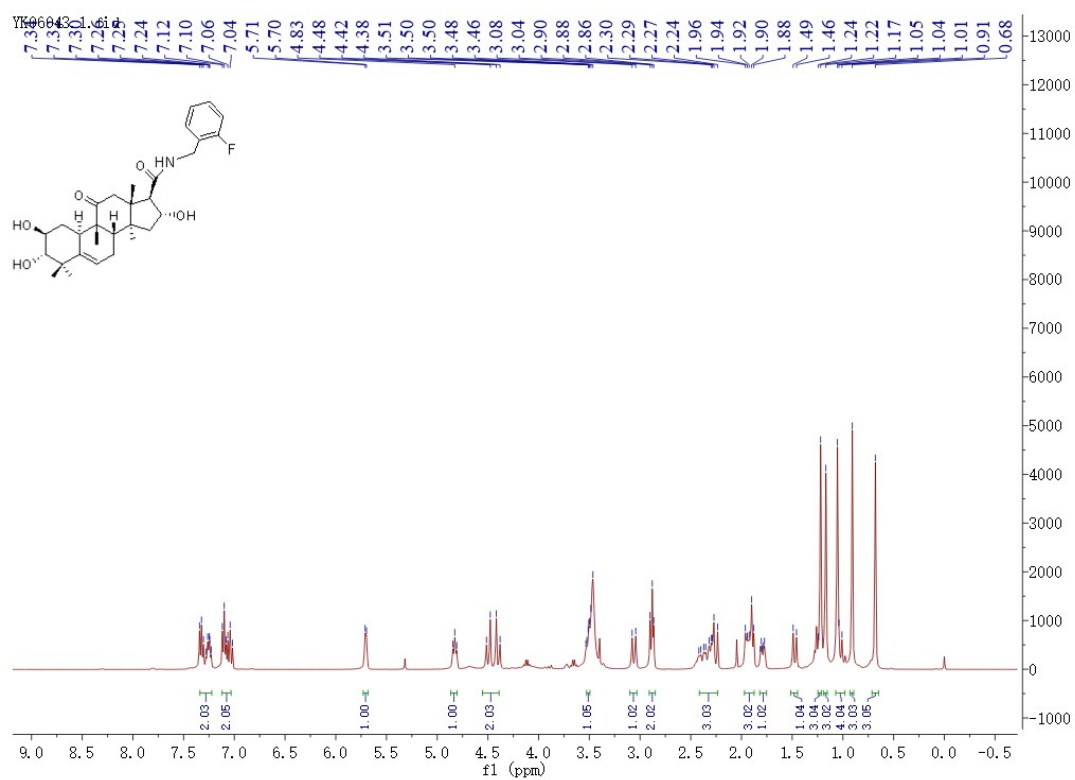

Fig. S57 <sup>1</sup>H NMR spectrum of **9g**

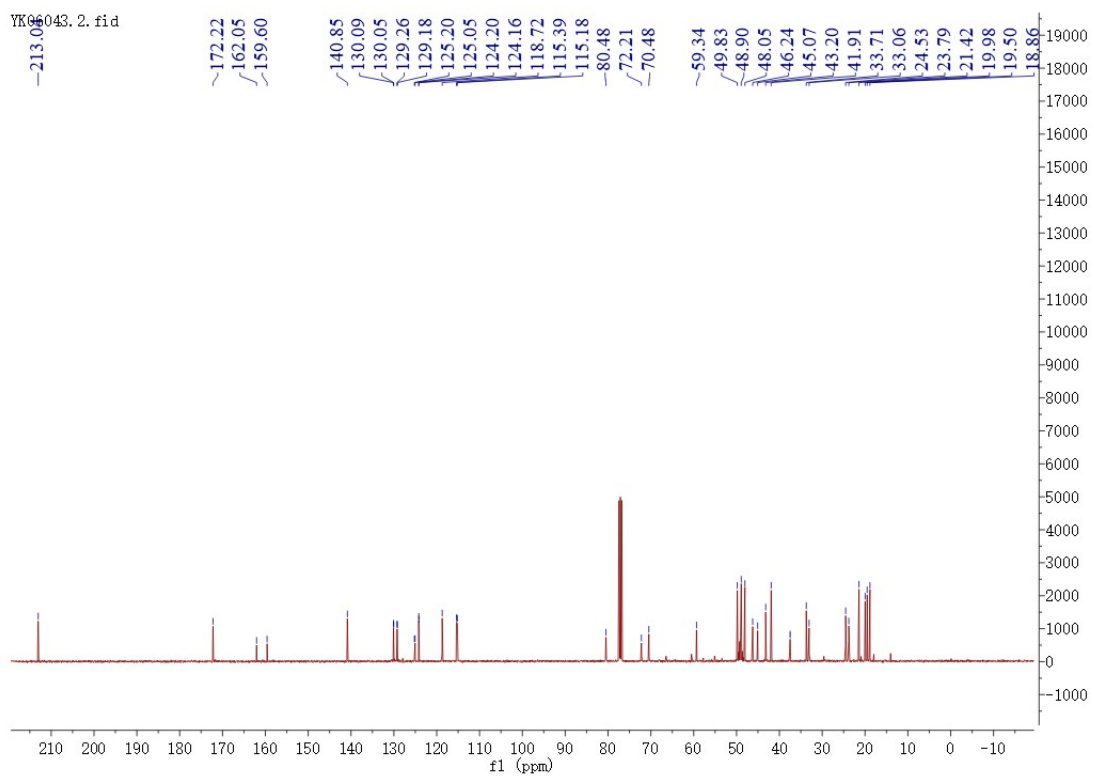

Fig. S58  $^{13}\text{C}$  NMR spectrum of **9g**

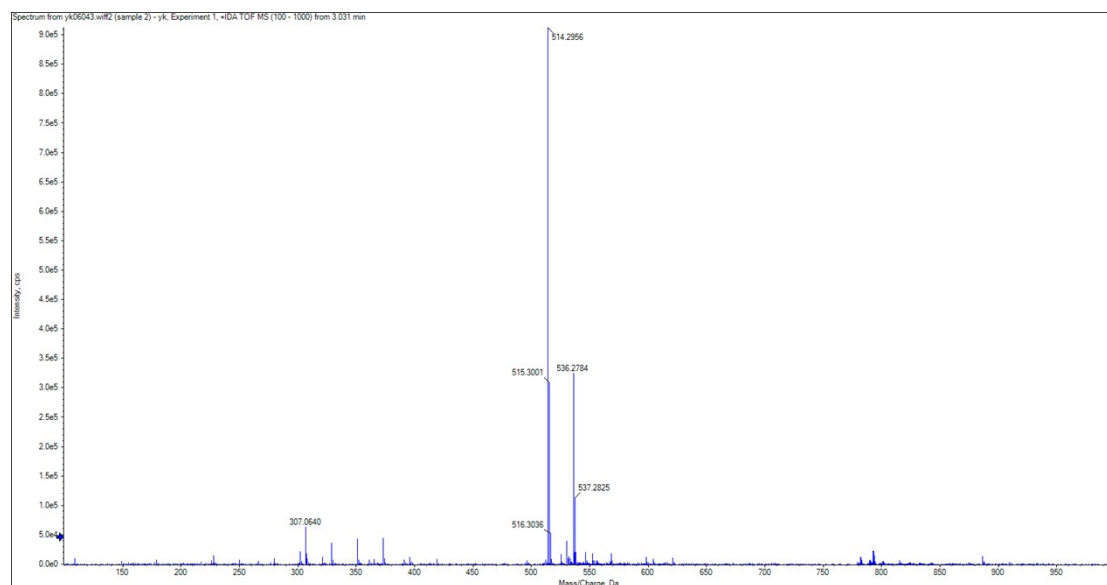

Fig. S59 HRMS spectrum of **9g**

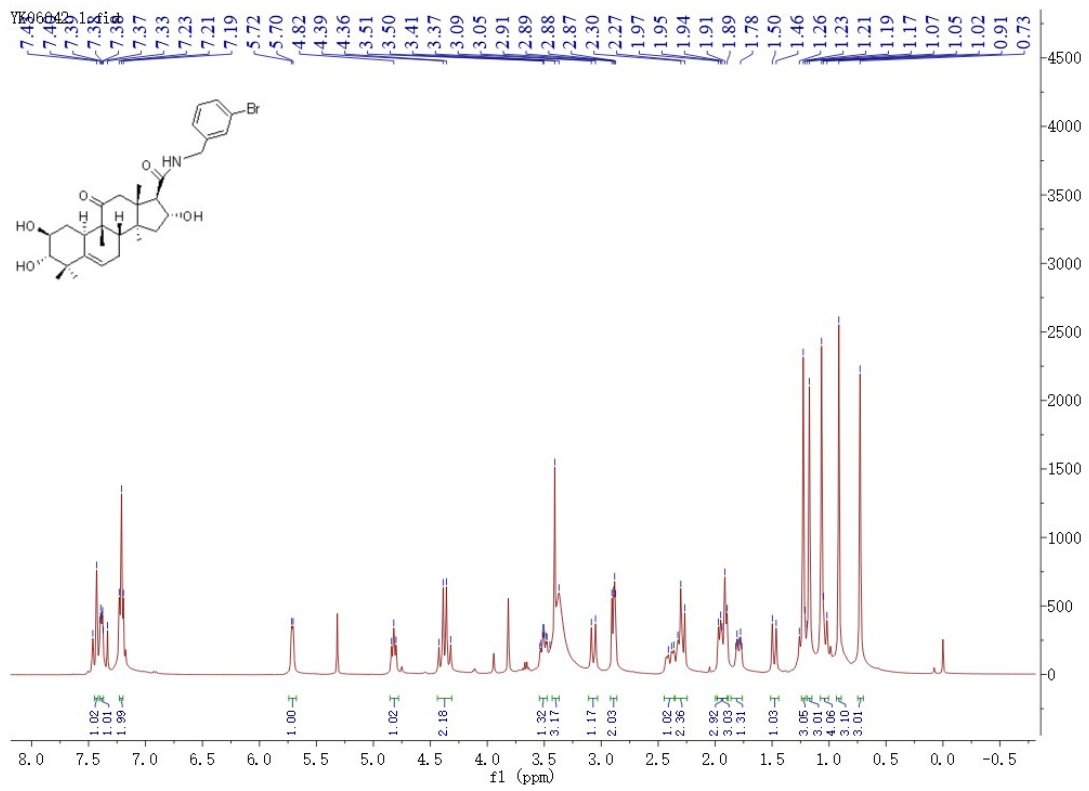

Fig. S60  $^1\text{H}$  NMR spectrum of 9h

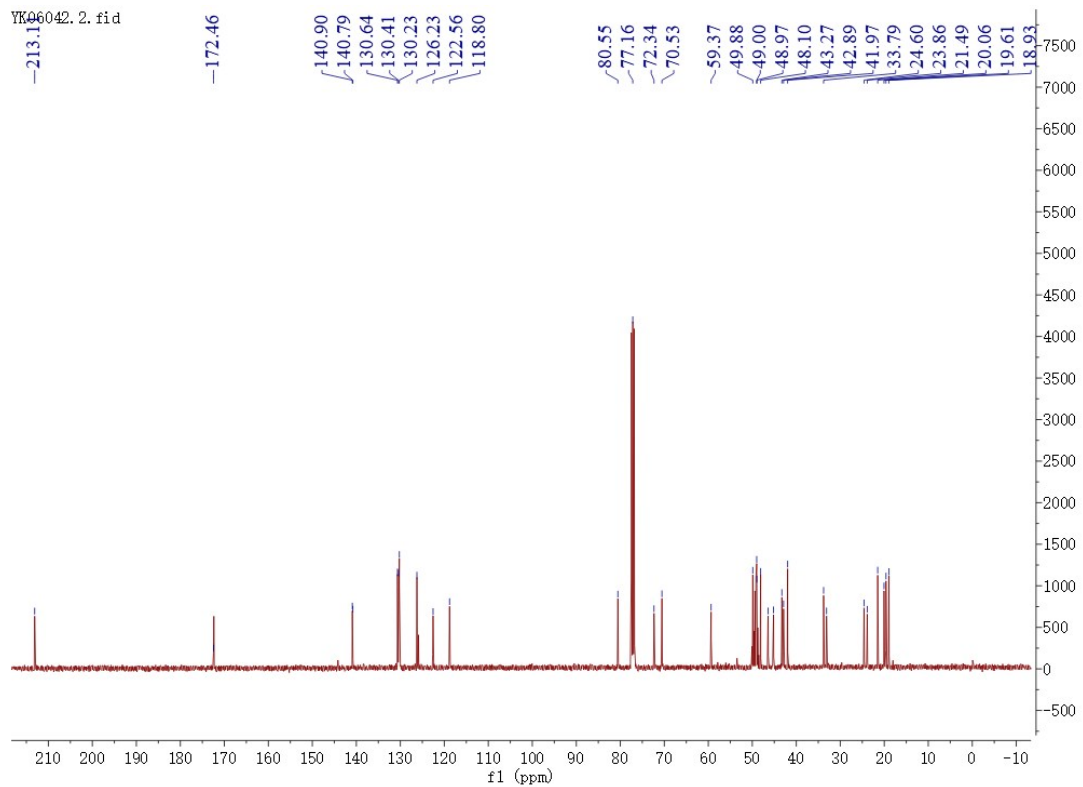

Fig. S61  $^{13}\text{C}$  NMR spectrum of 9h

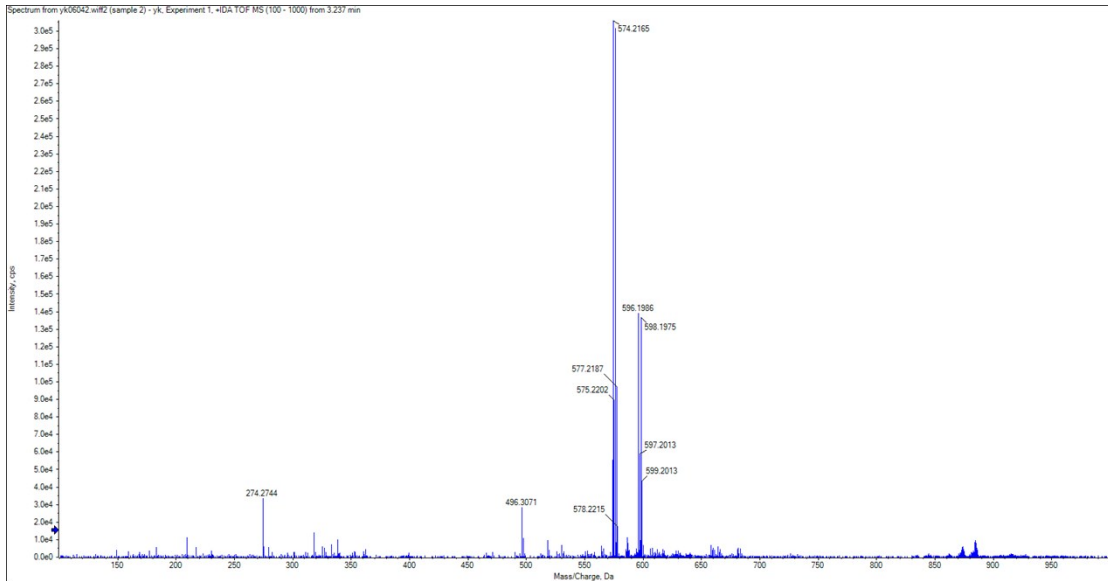

**Fig. S62** HRMS spectrum of **9h**

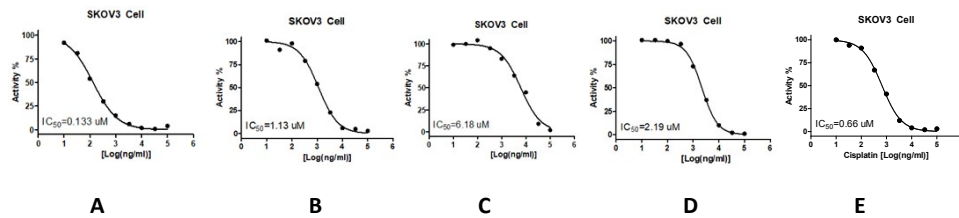

**Fig. S63** Cell viability assay after 72 hours treatment of compounds in SKOV3 cell line. A: compound **1**, B: compound **2**, C: compound **4a**, D: compound **4d**, E: compound **Cisplatin**.

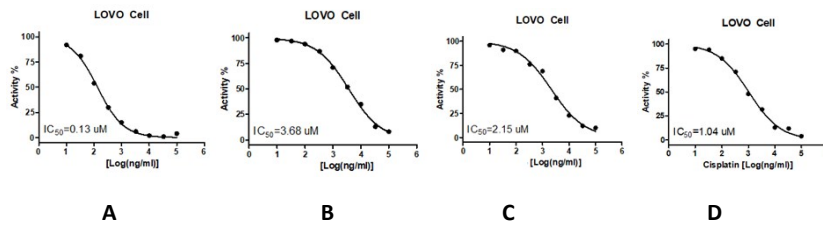

**Fig. S64** Cell viability assay after 72 hours treatment of compounds in LOVO cell line. A: compound **1**, B: compound **4a**, C: compound **4d**, D: compound **Cisplatin**.

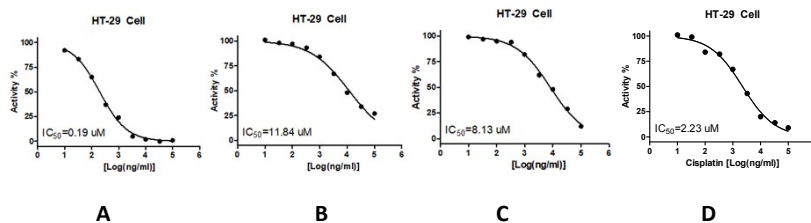

**Fig. S65** Cell viability assay after 72 hours treatment of compounds in HT-29 cell line. A: compound **1**, B: compound **4a**, C: compound **4d**, D: compound **Cisplatin**.



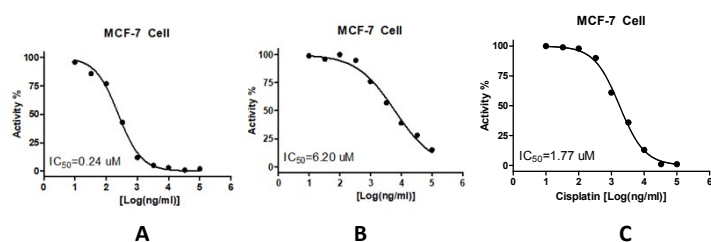

**Fig. S66** Cell viability assay after 72 hours treatment of compounds in MCF-7 cell line. A: compound **1**, B: compound **4a**, C: compound **Cisplatin**.

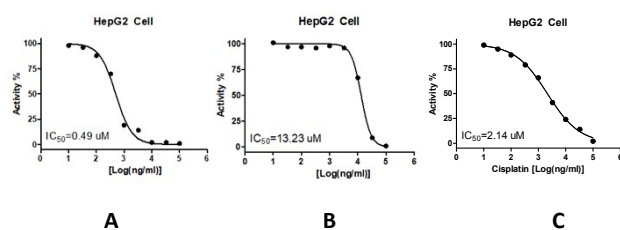

**Fig. S67** Cell viability assay after 72 hours treatment of compounds in HepG2 cell line. A: compound **1**, B: compound **4a**, C: compound **Cisplatin**.

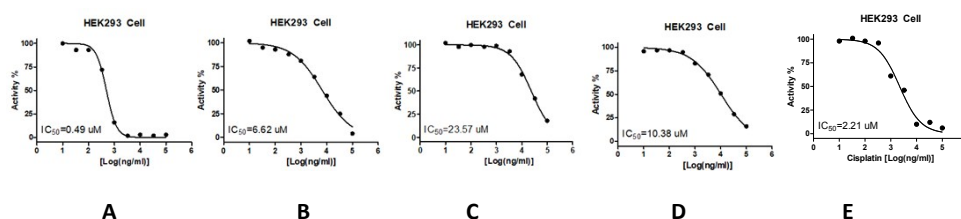

**Fig. S68** Cell viability assay after 72 hours treatment of compounds in HEK 293 cell line. A: compound **1**, B: compound **2**, C: compound **4a**, D: compound **4d**, E: compound **Cisplatin**.

**Tab. S1** Crystal data and structure refinement for **4b**

|                      |                                               |          |
|----------------------|-----------------------------------------------|----------|
| Identification code  | cu_20181106zinz_0m_a                          |          |
| Empirical formula    | C36 H47 N3 O9                                 |          |
| Formula weight       | 665.76                                        |          |
| Temperature          | 173(2) K                                      |          |
| Wavelength           | 1.54178 Å                                     |          |
| Crystal system       | Orthorhombic                                  |          |
| Space group          | P2 <sub>1</sub> 2 <sub>1</sub> 2 <sub>1</sub> |          |
| Unit cell dimensions | a = 10.8304(3) Å                              | α = 90°. |
|                      | b = 15.9589(4) Å                              | β = 90°. |
|                      | c = 21.2922(5) Å                              | γ = 90°. |
| Volume               | 3680.17(16) Å <sup>3</sup>                    |          |
| Z                    | 4                                             |          |
| Density (calculated) | 1.202 Mg/m <sup>3</sup>                       |          |

|                                   |                                             |
|-----------------------------------|---------------------------------------------|
| Absorption coefficient            | 0.709 mm <sup>-1</sup>                      |
| F(000)                            | 1424                                        |
| Crystal size                      | ? x ? x ? mm <sup>3</sup>                   |
| Theta range for data collection   | 3.461 to 58.926°.                           |
| Index ranges                      | -11<=h<=11, -16<=k<=17, -18<=l<=23          |
| Reflections collected             | 10488                                       |
| Independent reflections           | 4789 [R(int) = 0.0360]                      |
| Completeness to theta = 58.926°   | 94.2 %                                      |
| Refinement method                 | Full-matrix least-squares on F <sup>2</sup> |
| Data / restraints / parameters    | 4789 / 132 / 442                            |
| Goodness-of-fit on F <sup>2</sup> | 1.062                                       |
| Final R indices [I>2sigma(I)]     | R1 = 0.0434, wR2 = 0.1158                   |
| R indices (all data)              | R1 = 0.0441, wR2 = 0.1166                   |
| Absolute structure parameter      | 0.00(7)                                     |
| Extinction coefficient            | n/a                                         |
| Largest diff. peak and hole       | 0.274 and -0.464 e.Å <sup>-3</sup>          |

**Tab. S2** Bond lengths [Å] and angles [°] for **4a**

|            |          |
|------------|----------|
| C(1)-C(6)  | 4a       |
| C(1)-C(2)  | 1.381(6) |
| C(1)-N(1)  | 1.452(5) |
| C(2)-C(3)  | 1.368(5) |
| C(2)-H(2)  | 0.9500   |
| C(3)-C(4)  | 1.386(5) |
| C(3)-H(3)  | 0.9500   |
| C(4)-N(2)  | 1.379(5) |
| C(4)-C(5)  | 1.393(5) |
| C(5)-C(6)  | 1.381(6) |
| C(5)-H(5)  | 0.9500   |
| C(6)-H(6)  | 0.9500   |
| C(7)-N(3)  | 1.287(4) |
| C(7)-C(8)  | 1.488(5) |
| C(7)-C(9)  | 1.509(4) |
| C(8)-H(8A) | 0.9800   |
| C(8)-H(8B) | 0.9800   |
| C(8)-H(8C) | 0.9800   |
| C(9)-C(10) | 1.535(5) |
| C(9)-C(13) | 1.563(4) |

|              |          |
|--------------|----------|
| C(9)-H(9)    | 1.0000   |
| C(10)-O(5)   | 1.443(5) |
| C(10)-C(11)  | 1.527(5) |
| C(10)-H(10)  | 1.0000   |
| C(11)-C(12)  | 1.544(5) |
| C(11)-H(11A) | 0.9900   |
| C(11)-H(11B) | 0.9900   |
| C(12)-C(15)  | 1.535(5) |
| C(12)-C(19)  | 1.543(5) |
| C(12)-C(13)  | 1.565(4) |
| C(13)-C(16)  | 1.525(4) |
| C(13)-C(14)  | 1.535(5) |
| C(14)-H(14A) | 0.9800   |
| C(14)-H(14B) | 0.9800   |
| C(14)-H(14C) | 0.9800   |
| C(15)-H(15A) | 0.9800   |
| C(15)-H(15B) | 0.9800   |
| C(15)-H(15C) | 0.9800   |
| C(16)-C(17)  | 1.519(5) |
| C(16)-H(16A) | 0.9900   |
| C(16)-H(16B) | 0.9900   |
| C(17)-O(3)   | 1.210(4) |
| C(17)-C(18)  | 1.537(5) |
| C(18)-C(20)  | 1.546(5) |
| C(18)-C(19)  | 1.571(5) |
| C(18)-C(21)  | 1.583(4) |
| C(19)-C(24)  | 1.530(5) |
| C(19)-H(19)  | 1.0000   |
| C(20)-H(20A) | 0.9800   |
| C(20)-H(20B) | 0.9800   |
| C(20)-H(20C) | 0.9800   |
| C(21)-C(22)  | 1.523(4) |
| C(21)-C(25)  | 1.538(4) |
| C(21)-H(21)  | 1.0000   |
| C(22)-C(23)  | 1.327(5) |
| C(22)-C(28)  | 1.531(5) |
| C(23)-C(24)  | 1.484(6) |
| C(23)-H(23)  | 0.9500   |

|              |           |
|--------------|-----------|
| C(24)-H(24A) | 0.9900    |
| C(24)-H(24B) | 0.9900    |
| C(25)-C(26)  | 1.508(5)  |
| C(25)-H(25A) | 0.9900    |
| C(25)-H(25B) | 0.9900    |
| C(26)-O(6)   | 1.443(4)  |
| C(26)-C(27)  | 1.513(4)  |
| C(26)-H(26)  | 1.0000    |
| C(27)-O(8)   | 1.456(4)  |
| C(27)-C(28)  | 1.539(5)  |
| C(27)-H(27)  | 1.0000    |
| C(28)-C(29)  | 1.536(4)  |
| C(28)-C(30)  | 1.548(4)  |
| C(29)-H(29A) | 0.9800    |
| C(29)-H(29B) | 0.9800    |
| C(29)-H(29C) | 0.9800    |
| C(30)-H(30A) | 0.9800    |
| C(30)-H(30B) | 0.9800    |
| C(30)-H(30C) | 0.9800    |
| C(31)-O(9)   | 1.186(4)  |
| C(31)-O(8)   | 1.348(4)  |
| C(31)-C(32)  | 1.493(5)  |
| C(32)-H(32A) | 0.9800    |
| C(32)-H(32B) | 0.9800    |
| C(32)-H(32C) | 0.9800    |
| C(33)-O(7)   | 1.199(4)  |
| C(33)-O(6)   | 1.334(4)  |
| C(33)-C(34)  | 1.495(5)  |
| C(34)-H(34A) | 0.9800    |
| C(34)-H(34B) | 0.9800    |
| C(34)-H(34C) | 0.9800    |
| C(35)-C(36)  | 1.471(10) |
| C(35)-H(35A) | 0.9800    |
| C(35)-H(35B) | 0.9800    |
| C(35)-H(35C) | 0.9800    |
| C(36)-O(4)   | 1.226(9)  |
| C(36)-O(5)   | 1.292(7)  |
| N(1)-O(1)    | 1.221(5)  |

|                  |          |
|------------------|----------|
| N(1)-O(2)        | 1.226(6) |
| N(2)-N(3)        | 1.368(4) |
| N(2)-H(2A)       | 0.8800   |
| C(6)-C(1)-C(2)   | 121.6(4) |
| C(6)-C(1)-N(1)   | 118.8(4) |
| C(2)-C(1)-N(1)   | 119.6(4) |
| C(3)-C(2)-C(1)   | 119.3(3) |
| C(3)-C(2)-H(2)   | 120.4    |
| C(1)-C(2)-H(2)   | 120.4    |
| C(2)-C(3)-C(4)   | 120.2(3) |
| C(2)-C(3)-H(3)   | 119.9    |
| C(4)-C(3)-H(3)   | 119.9    |
| N(2)-C(4)-C(3)   | 119.0(3) |
| N(2)-C(4)-C(5)   | 121.0(3) |
| C(3)-C(4)-C(5)   | 120.0(3) |
| C(6)-C(5)-C(4)   | 119.7(4) |
| C(6)-C(5)-H(5)   | 120.2    |
| C(4)-C(5)-H(5)   | 120.2    |
| C(1)-C(6)-C(5)   | 119.2(4) |
| C(1)-C(6)-H(6)   | 120.4    |
| C(5)-C(6)-H(6)   | 120.4    |
| N(3)-C(7)-C(8)   | 124.5(3) |
| N(3)-C(7)-C(9)   | 116.1(3) |
| C(8)-C(7)-C(9)   | 119.4(3) |
| C(7)-C(8)-H(8A)  | 109.5    |
| C(7)-C(8)-H(8B)  | 109.5    |
| H(8A)-C(8)-H(8B) | 109.5    |
| C(7)-C(8)-H(8C)  | 109.5    |
| H(8A)-C(8)-H(8C) | 109.5    |
| H(8B)-C(8)-H(8C) | 109.5    |
| C(7)-C(9)-C(10)  | 114.6(3) |
| C(7)-C(9)-C(13)  | 117.0(3) |
| C(10)-C(9)-C(13) | 101.5(3) |
| C(7)-C(9)-H(9)   | 107.8    |
| C(10)-C(9)-H(9)  | 107.8    |
| C(13)-C(9)-H(9)  | 107.8    |
| O(5)-C(10)-C(11) | 113.2(3) |
| O(5)-C(10)-C(9)  | 106.6(3) |

|                     |          |
|---------------------|----------|
| C(11)-C(10)-C(9)    | 107.9(3) |
| O(5)-C(10)-H(10)    | 109.7    |
| C(11)-C(10)-H(10)   | 109.7    |
| C(9)-C(10)-H(10)    | 109.7    |
| C(10)-C(11)-C(12)   | 105.2(3) |
| C(10)-C(11)-H(11A)  | 110.7    |
| C(12)-C(11)-H(11A)  | 110.7    |
| C(10)-C(11)-H(11B)  | 110.7    |
| C(12)-C(11)-H(11B)  | 110.7    |
| H(11A)-C(11)-H(11B) | 108.8    |
| C(15)-C(12)-C(19)   | 112.7(3) |
| C(15)-C(12)-C(11)   | 106.8(3) |
| C(19)-C(12)-C(11)   | 114.4(3) |
| C(15)-C(12)-C(13)   | 113.4(3) |
| C(19)-C(12)-C(13)   | 107.7(3) |
| C(11)-C(12)-C(13)   | 101.3(2) |
| C(16)-C(13)-C(14)   | 106.8(3) |
| C(16)-C(13)-C(9)    | 118.0(3) |
| C(14)-C(13)-C(9)    | 108.4(3) |
| C(16)-C(13)-C(12)   | 109.1(2) |
| C(14)-C(13)-C(12)   | 114.1(3) |
| C(9)-C(13)-C(12)    | 100.6(2) |
| C(13)-C(14)-H(14A)  | 109.5    |
| C(13)-C(14)-H(14B)  | 109.5    |
| H(14A)-C(14)-H(14B) | 109.5    |
| C(13)-C(14)-H(14C)  | 109.5    |
| H(14A)-C(14)-H(14C) | 109.5    |
| H(14B)-C(14)-H(14C) | 109.5    |
| C(12)-C(15)-H(15A)  | 109.5    |
| C(12)-C(15)-H(15B)  | 109.5    |
| H(15A)-C(15)-H(15B) | 109.5    |
| C(12)-C(15)-H(15C)  | 109.5    |
| H(15A)-C(15)-H(15C) | 109.5    |
| H(15B)-C(15)-H(15C) | 109.5    |
| C(17)-C(16)-C(13)   | 109.3(3) |
| C(17)-C(16)-H(16A)  | 109.8    |
| C(13)-C(16)-H(16A)  | 109.8    |
| C(17)-C(16)-H(16B)  | 109.8    |

|                     |          |
|---------------------|----------|
| C(13)-C(16)-H(16B)  | 109.8    |
| H(16A)-C(16)-H(16B) | 108.3    |
| O(3)-C(17)-C(16)    | 119.2(3) |
| O(3)-C(17)-C(18)    | 121.1(3) |
| C(16)-C(17)-C(18)   | 119.7(3) |
| C(17)-C(18)-C(20)   | 108.6(3) |
| C(17)-C(18)-C(19)   | 113.5(3) |
| C(20)-C(18)-C(19)   | 107.2(3) |
| C(17)-C(18)-C(21)   | 103.9(2) |
| C(20)-C(18)-C(21)   | 110.8(3) |
| C(19)-C(18)-C(21)   | 112.9(3) |
| C(24)-C(19)-C(12)   | 114.9(3) |
| C(24)-C(19)-C(18)   | 111.1(3) |
| C(12)-C(19)-C(18)   | 114.6(2) |
| C(24)-C(19)-H(19)   | 105.0    |
| C(12)-C(19)-H(19)   | 105.0    |
| C(18)-C(19)-H(19)   | 105.0    |
| C(18)-C(20)-H(20A)  | 109.5    |
| C(18)-C(20)-H(20B)  | 109.5    |
| H(20A)-C(20)-H(20B) | 109.5    |
| C(18)-C(20)-H(20C)  | 109.5    |
| H(20A)-C(20)-H(20C) | 109.5    |
| H(20B)-C(20)-H(20C) | 109.5    |
| C(22)-C(21)-C(25)   | 109.2(2) |
| C(22)-C(21)-C(18)   | 114.8(3) |
| C(25)-C(21)-C(18)   | 111.6(3) |
| C(22)-C(21)-H(21)   | 107.0    |
| C(25)-C(21)-H(21)   | 107.0    |
| C(18)-C(21)-H(21)   | 107.0    |
| C(23)-C(22)-C(21)   | 121.9(3) |
| C(23)-C(22)-C(28)   | 122.5(3) |
| C(21)-C(22)-C(28)   | 115.5(3) |
| C(22)-C(23)-C(24)   | 125.3(3) |
| C(22)-C(23)-H(23)   | 117.3    |
| C(24)-C(23)-H(23)   | 117.3    |
| C(23)-C(24)-C(19)   | 115.3(3) |
| C(23)-C(24)-H(24A)  | 108.5    |
| C(19)-C(24)-H(24A)  | 108.5    |

|                     |          |
|---------------------|----------|
| C(23)-C(24)-H(24B)  | 108.5    |
| C(19)-C(24)-H(24B)  | 108.5    |
| H(24A)-C(24)-H(24B) | 107.5    |
| C(26)-C(25)-C(21)   | 112.2(3) |
| C(26)-C(25)-H(25A)  | 109.2    |
| C(21)-C(25)-H(25A)  | 109.2    |
| C(26)-C(25)-H(25B)  | 109.2    |
| C(21)-C(25)-H(25B)  | 109.2    |
| H(25A)-C(25)-H(25B) | 107.9    |
| O(6)-C(26)-C(25)    | 109.4(3) |
| O(6)-C(26)-C(27)    | 104.7(2) |
| C(25)-C(26)-C(27)   | 110.1(3) |
| O(6)-C(26)-H(26)    | 110.8    |
| C(25)-C(26)-H(26)   | 110.8    |
| C(27)-C(26)-H(26)   | 110.8    |
| O(8)-C(27)-C(26)    | 106.2(3) |
| O(8)-C(27)-C(28)    | 109.8(3) |
| C(26)-C(27)-C(28)   | 114.0(2) |
| O(8)-C(27)-H(27)    | 108.9    |
| C(26)-C(27)-H(27)   | 108.9    |
| C(28)-C(27)-H(27)   | 108.9    |
| C(22)-C(28)-C(29)   | 113.0(3) |
| C(22)-C(28)-C(27)   | 108.4(3) |
| C(29)-C(28)-C(27)   | 107.8(3) |
| C(22)-C(28)-C(30)   | 109.0(3) |
| C(29)-C(28)-C(30)   | 107.9(3) |
| C(27)-C(28)-C(30)   | 110.6(3) |
| C(28)-C(29)-H(29A)  | 109.5    |
| C(28)-C(29)-H(29B)  | 109.5    |
| H(29A)-C(29)-H(29B) | 109.5    |
| C(28)-C(29)-H(29C)  | 109.5    |
| H(29A)-C(29)-H(29C) | 109.5    |
| H(29B)-C(29)-H(29C) | 109.5    |
| C(28)-C(30)-H(30A)  | 109.5    |
| C(28)-C(30)-H(30B)  | 109.5    |
| H(30A)-C(30)-H(30B) | 109.5    |
| C(28)-C(30)-H(30C)  | 109.5    |
| H(30A)-C(30)-H(30C) | 109.5    |



|                     |          |
|---------------------|----------|
| H(30B)-C(30)-H(30C) | 109.5    |
| O(9)-C(31)-O(8)     | 124.9(3) |
| O(9)-C(31)-C(32)    | 124.6(3) |
| O(8)-C(31)-C(32)    | 110.5(3) |
| C(31)-C(32)-H(32A)  | 109.5    |
| C(31)-C(32)-H(32B)  | 109.5    |
| H(32A)-C(32)-H(32B) | 109.5    |
| C(31)-C(32)-H(32C)  | 109.5    |
| H(32A)-C(32)-H(32C) | 109.5    |
| H(32B)-C(32)-H(32C) | 109.5    |
| O(7)-C(33)-O(6)     | 123.8(3) |
| O(7)-C(33)-C(34)    | 125.0(3) |
| O(6)-C(33)-C(34)    | 111.2(3) |
| C(33)-C(34)-H(34A)  | 109.5    |
| C(33)-C(34)-H(34B)  | 109.5    |
| H(34A)-C(34)-H(34B) | 109.5    |
| C(33)-C(34)-H(34C)  | 109.5    |
| H(34A)-C(34)-H(34C) | 109.5    |
| H(34B)-C(34)-H(34C) | 109.5    |
| C(36)-C(35)-H(35A)  | 109.5    |
| C(36)-C(35)-H(35B)  | 109.5    |
| H(35A)-C(35)-H(35B) | 109.5    |
| C(36)-C(35)-H(35C)  | 109.5    |
| H(35A)-C(35)-H(35C) | 109.5    |
| H(35B)-C(35)-H(35C) | 109.5    |
| O(4)-C(36)-O(5)     | 121.4(7) |
| O(4)-C(36)-C(35)    | 124.9(6) |
| O(5)-C(36)-C(35)    | 113.6(7) |
| O(1)-N(1)-O(2)      | 123.1(4) |
| O(1)-N(1)-C(1)      | 118.2(4) |
| O(2)-N(1)-C(1)      | 118.7(4) |
| N(3)-N(2)-C(4)      | 116.7(3) |
| N(3)-N(2)-H(2A)     | 121.6    |
| C(4)-N(2)-H(2A)     | 121.6    |
| C(7)-N(3)-N(2)      | 119.1(3) |
| C(36)-O(5)-C(10)    | 118.3(5) |
| C(33)-O(6)-C(26)    | 119.3(2) |
| C(31)-O(8)-C(27)    | 118.8(2) |

---

**Tab. S3** Crystal data and structure refinement for **5a**

---

|                                   |                                             |                  |
|-----------------------------------|---------------------------------------------|------------------|
| Identification code               | 5a                                          |                  |
| Empirical formula                 | C30 H43 N O8                                |                  |
| Formula weight                    | 545.65                                      |                  |
| Temperature                       | 173(2) K                                    |                  |
| Wavelength                        | 1.34139 Å                                   |                  |
| Crystal system                    | Monoclinic                                  |                  |
| Space group                       | P2 <sub>1</sub>                             |                  |
| Unit cell dimensions              | a = 8.5713(6) Å                             | α = 90°.         |
|                                   | b = 31.375(2) Å                             | β = 105.525(2)°. |
|                                   | c = 11.2567(8) Å                            | γ = 90°.         |
| Volume                            | 2916.8(4) Å <sup>3</sup>                    |                  |
| Z                                 | 4                                           |                  |
| Density (calculated)              | 1.243 Mg/m <sup>3</sup>                     |                  |
| Absorption coefficient            | 0.466 mm <sup>-1</sup>                      |                  |
| F(000)                            | 1176                                        |                  |
| Crystal size                      | 0.220 x 0.180 x 0.160 mm <sup>3</sup>       |                  |
| Theta range for data collection   | 2.450 to 52.999°.                           |                  |
| Index ranges                      | -9 ≤ h ≤ 10, -37 ≤ k ≤ 37, -13 ≤ l ≤ 13     |                  |
| Reflections collected             | 58880                                       |                  |
| Independent reflections           | 10226 [R(int) = 0.0733]                     |                  |
| Completeness to theta = 52.999°   | 99.5 %                                      |                  |
| Refinement method                 | Full-matrix least-squares on F <sup>2</sup> |                  |
| Data / restraints / parameters    | 10226 / 109 / 723                           |                  |
| Goodness-of-fit on F <sup>2</sup> | 1.013                                       |                  |
| Final R indices [I > 2σ(I)]       | R1 = 0.0354, wR2 = 0.0909                   |                  |
| R indices (all data)              | R1 = 0.0379, wR2 = 0.0931                   |                  |
| Absolute structure parameter      | 0.18(7)                                     |                  |
| Extinction coefficient            | n/a                                         |                  |
| Largest diff. peak and hole       | 0.250 and -0.180 e.Å <sup>-3</sup>          |                  |

---

**Tab. S4** Bond lengths [Å] and angles [°] for **4a**

---

|              |          |
|--------------|----------|
| C(1)-C(2)    | 1.493(4) |
| C(1)-H(1A)   | 0.9800   |
| C(1)-H(1B)   | 0.9800   |
| C(1)-H(1C)   | 0.9800   |
| C(2)-O(1)    | 1.192(4) |
| C(2)-O(2)    | 1.343(4) |
| C(3)-C(4)    | 1.496(4) |
| C(3)-H(3A)   | 0.9800   |
| C(3)-H(3B)   | 0.9800   |
| C(3)-H(3C)   | 0.9800   |
| C(4)-O(3)    | 1.197(3) |
| C(4)-O(4)    | 1.336(3) |
| C(5)-O(4)    | 1.458(3) |
| C(5)-C(6)    | 1.508(3) |
| C(5)-C(10)   | 1.515(3) |
| C(5)-H(5)    | 1.0000   |
| C(6)-O(2)    | 1.454(3) |
| C(6)-C(7)    | 1.542(4) |
| C(6)-H(6)    | 1.0000   |
| C(7)-C(12)   | 1.526(4) |
| C(7)-C(8)    | 1.543(4) |
| C(7)-C(11)   | 1.543(4) |
| C(8)-C(17)   | 1.326(4) |
| C(8)-C(9)    | 1.513(3) |
| C(9)-C(10)   | 1.534(3) |
| C(9)-C(13)   | 1.569(3) |
| C(9)-H(9)    | 1.0000   |
| C(10)-H(10A) | 0.9900   |
| C(10)-H(10B) | 0.9900   |
| C(11)-H(11A) | 0.9800   |
| C(11)-H(11B) | 0.9800   |
| C(11)-H(11C) | 0.9800   |
| C(12)-H(12A) | 0.9800   |
| C(12)-H(12B) | 0.9800   |
| C(12)-H(12C) | 0.9800   |
| C(13)-C(14)  | 1.540(4) |
| C(13)-C(23)  | 1.538(4) |

|              |          |
|--------------|----------|
| C(13)-C(15)  | 1.562(3) |
| C(14)-H(14A) | 0.9800   |
| C(14)-H(14B) | 0.9800   |
| C(14)-H(14C) | 0.9800   |
| C(15)-C(19)  | 1.539(4) |
| C(15)-C(16)  | 1.536(4) |
| C(15)-H(15)  | 1.0000   |
| C(16)-C(17)  | 1.495(4) |
| C(16)-H(16A) | 0.9900   |
| C(16)-H(16B) | 0.9900   |
| C(17)-H(17)  | 0.9500   |
| C(18)-C(19)  | 1.543(4) |
| C(18)-H(18A) | 0.9800   |
| C(18)-H(18B) | 0.9800   |
| C(18)-H(18C) | 0.9800   |
| C(19)-C(24)  | 1.544(4) |
| C(19)-C(20)  | 1.561(3) |
| C(20)-C(22)  | 1.531(3) |
| C(20)-C(21)  | 1.541(4) |
| C(20)-C(26)  | 1.548(4) |
| C(21)-H(21A) | 0.9800   |
| C(21)-H(21B) | 0.9800   |
| C(21)-H(21C) | 0.9800   |
| C(22)-C(23)  | 1.515(4) |
| C(22)-H(22A) | 0.9900   |
| C(22)-H(22B) | 0.9900   |
| C(23)-O(5)   | 1.215(3) |
| C(24)-C(25)  | 1.542(4) |
| C(24)-H(24A) | 0.9900   |
| C(24)-H(24B) | 0.9900   |
| C(25)-O(6)   | 1.466(4) |
| C(25)-C(26)  | 1.535(4) |
| C(25)-H(25)  | 1.0000   |
| C(26)-C(27)  | 1.514(4) |
| C(26)-H(26)  | 1.0000   |
| C(27)-N(1)   | 1.275(4) |
| C(27)-C(28)  | 1.480(4) |
| C(28)-H(28A) | 0.9800   |

|              |          |
|--------------|----------|
| C(28)-H(28B) | 0.9800   |
| C(28)-H(28C) | 0.9800   |
| C(29)-O(7)   | 1.233(7) |
| C(29)-O(6)   | 1.333(5) |
| C(29)-C(30)  | 1.510(8) |
| C(30)-H(30A) | 0.9800   |
| C(30)-H(30B) | 0.9800   |
| C(30)-H(30C) | 0.9800   |
| C(31)-C(32)  | 1.499(4) |
| C(31)-H(31A) | 0.9800   |
| C(31)-H(31B) | 0.9800   |
| C(31)-H(31C) | 0.9800   |
| C(32)-O(9)   | 1.200(3) |
| C(32)-O(10)  | 1.354(3) |
| C(33)-C(34)  | 1.489(4) |
| C(33)-H(33A) | 0.9800   |
| C(33)-H(33B) | 0.9800   |
| C(33)-H(33C) | 0.9800   |
| C(34)-O(11)  | 1.208(3) |
| C(34)-O(12)  | 1.337(3) |
| C(35)-O(10)  | 1.451(3) |
| C(35)-C(40)  | 1.507(3) |
| C(35)-C(36)  | 1.516(3) |
| C(35)-H(35)  | 1.0000   |
| C(36)-O(12)  | 1.458(3) |
| C(36)-C(37)  | 1.544(3) |
| C(36)-H(36)  | 1.0000   |
| C(37)-C(42)  | 1.529(3) |
| C(37)-C(38)  | 1.538(3) |
| C(37)-C(41)  | 1.544(3) |
| C(38)-C(46)  | 1.326(4) |
| C(38)-C(39)  | 1.525(3) |
| C(39)-C(40)  | 1.538(3) |
| C(39)-C(43)  | 1.574(3) |
| C(39)-H(39)  | 1.0000   |
| C(40)-H(40A) | 0.9900   |
| C(40)-H(40B) | 0.9900   |
| C(41)-H(41A) | 0.9800   |

|              |          |
|--------------|----------|
| C(41)-H(41B) | 0.9800   |
| C(41)-H(41C) | 0.9800   |
| C(42)-H(42A) | 0.9800   |
| C(42)-H(42B) | 0.9800   |
| C(42)-H(42C) | 0.9800   |
| C(43)-C(47)  | 1.530(4) |
| C(43)-C(53)  | 1.548(4) |
| C(43)-C(44)  | 1.559(3) |
| C(44)-C(45)  | 1.537(3) |
| C(44)-C(48)  | 1.540(3) |
| C(44)-H(44)  | 1.0000   |
| C(45)-C(46)  | 1.494(3) |
| C(45)-H(45A) | 0.9900   |
| C(45)-H(45B) | 0.9900   |
| C(46)-H(46)  | 0.9500   |
| C(47)-H(47A) | 0.9800   |
| C(47)-H(47B) | 0.9800   |
| C(47)-H(47C) | 0.9800   |
| C(48)-C(49)  | 1.543(4) |
| C(48)-C(54)  | 1.544(3) |
| C(48)-C(50)  | 1.567(3) |
| C(49)-H(49A) | 0.9800   |
| C(49)-H(49B) | 0.9800   |
| C(49)-H(49C) | 0.9800   |
| C(50)-C(52)  | 1.533(3) |
| C(50)-C(51)  | 1.550(3) |
| C(50)-C(56)  | 1.552(3) |
| C(51)-H(51A) | 0.9800   |
| C(51)-H(51B) | 0.9800   |
| C(51)-H(51C) | 0.9800   |
| C(52)-C(53)  | 1.518(4) |
| C(52)-H(52A) | 0.9900   |
| C(52)-H(52B) | 0.9900   |
| C(53)-O(13)  | 1.211(3) |
| C(54)-C(55)  | 1.545(4) |
| C(54)-H(54A) | 0.9900   |
| C(54)-H(54B) | 0.9900   |
| C(55)-O(16)  | 1.455(3) |

|              |          |
|--------------|----------|
| C(55)-C(56)  | 1.538(3) |
| C(55)-H(55)  | 1.0000   |
| C(56)-C(59)  | 1.512(3) |
| C(56)-H(56)  | 1.0000   |
| C(57)-C(58)  | 1.491(5) |
| C(57)-H(57A) | 0.9800   |
| C(57)-H(57B) | 0.9800   |
| C(57)-H(57C) | 0.9800   |
| C(58)-O(15)  | 1.198(4) |
| C(58)-O(16)  | 1.348(4) |
| C(59)-N(2)   | 1.273(3) |
| C(59)-C(60)  | 1.494(4) |
| C(60)-H(60A) | 0.9800   |
| C(60)-H(60B) | 0.9800   |
| C(60)-H(60C) | 0.9800   |
| N(1)-O(8)    | 1.412(3) |
| N(2)-O(14)   | 1.417(3) |
| O(8)-H(8)    | 0.8400   |
| O(14)-H(14)  | 0.8400   |

|                  |          |
|------------------|----------|
| C(2)-C(1)-H(1A)  | 109.5    |
| C(2)-C(1)-H(1B)  | 109.5    |
| H(1A)-C(1)-H(1B) | 109.5    |
| C(2)-C(1)-H(1C)  | 109.5    |
| H(1A)-C(1)-H(1C) | 109.5    |
| H(1B)-C(1)-H(1C) | 109.5    |
| O(1)-C(2)-O(2)   | 124.2(3) |
| O(1)-C(2)-C(1)   | 124.8(3) |
| O(2)-C(2)-C(1)   | 111.1(3) |
| C(4)-C(3)-H(3A)  | 109.5    |
| C(4)-C(3)-H(3B)  | 109.5    |
| H(3A)-C(3)-H(3B) | 109.5    |
| C(4)-C(3)-H(3C)  | 109.5    |
| H(3A)-C(3)-H(3C) | 109.5    |
| H(3B)-C(3)-H(3C) | 109.5    |
| O(3)-C(4)-O(4)   | 124.2(2) |
| O(3)-C(4)-C(3)   | 124.9(3) |
| O(4)-C(4)-C(3)   | 110.9(2) |

|                     |            |
|---------------------|------------|
| O(4)-C(5)-C(6)      | 108.13(19) |
| O(4)-C(5)-C(10)     | 106.19(19) |
| C(6)-C(5)-C(10)     | 110.2(2)   |
| O(4)-C(5)-H(5)      | 110.7      |
| C(6)-C(5)-H(5)      | 110.7      |
| C(10)-C(5)-H(5)     | 110.7      |
| O(2)-C(6)-C(5)      | 106.8(2)   |
| O(2)-C(6)-C(7)      | 109.2(2)   |
| C(5)-C(6)-C(7)      | 113.1(2)   |
| O(2)-C(6)-H(6)      | 109.2      |
| C(5)-C(6)-H(6)      | 109.2      |
| C(7)-C(6)-H(6)      | 109.2      |
| C(12)-C(7)-C(6)     | 108.2(2)   |
| C(12)-C(7)-C(8)     | 112.4(2)   |
| C(6)-C(7)-C(8)      | 109.79(19) |
| C(12)-C(7)-C(11)    | 108.6(2)   |
| C(6)-C(7)-C(11)     | 110.5(2)   |
| C(8)-C(7)-C(11)     | 107.4(2)   |
| C(17)-C(8)-C(9)     | 122.1(2)   |
| C(17)-C(8)-C(7)     | 122.0(2)   |
| C(9)-C(8)-C(7)      | 115.6(2)   |
| C(8)-C(9)-C(10)     | 110.1(2)   |
| C(8)-C(9)-C(13)     | 113.8(2)   |
| C(10)-C(9)-C(13)    | 111.62(19) |
| C(8)-C(9)-H(9)      | 107.0      |
| C(10)-C(9)-H(9)     | 107.0      |
| C(13)-C(9)-H(9)     | 107.0      |
| C(5)-C(10)-C(9)     | 110.1(2)   |
| C(5)-C(10)-H(10A)   | 109.6      |
| C(9)-C(10)-H(10A)   | 109.6      |
| C(5)-C(10)-H(10B)   | 109.6      |
| C(9)-C(10)-H(10B)   | 109.6      |
| H(10A)-C(10)-H(10B) | 108.2      |
| C(7)-C(11)-H(11A)   | 109.5      |
| C(7)-C(11)-H(11B)   | 109.5      |
| H(11A)-C(11)-H(11B) | 109.5      |
| C(7)-C(11)-H(11C)   | 109.5      |
| H(11A)-C(11)-H(11C) | 109.5      |



|                     |          |
|---------------------|----------|
| H(11B)-C(11)-H(11C) | 109.5    |
| C(7)-C(12)-H(12A)   | 109.5    |
| C(7)-C(12)-H(12B)   | 109.5    |
| H(12A)-C(12)-H(12B) | 109.5    |
| C(7)-C(12)-H(12C)   | 109.5    |
| H(12A)-C(12)-H(12C) | 109.5    |
| H(12B)-C(12)-H(12C) | 109.5    |
| C(14)-C(13)-C(23)   | 109.1(2) |
| C(14)-C(13)-C(15)   | 107.4(2) |
| C(23)-C(13)-C(15)   | 112.3(2) |
| C(14)-C(13)-C(9)    | 110.6(2) |
| C(23)-C(13)-C(9)    | 104.5(2) |
| C(15)-C(13)-C(9)    | 112.9(2) |
| C(13)-C(14)-H(14A)  | 109.5    |
| C(13)-C(14)-H(14B)  | 109.5    |
| H(14A)-C(14)-H(14B) | 109.5    |
| C(13)-C(14)-H(14C)  | 109.5    |
| H(14A)-C(14)-H(14C) | 109.5    |
| H(14B)-C(14)-H(14C) | 109.5    |
| C(19)-C(15)-C(16)   | 115.2(2) |
| C(19)-C(15)-C(13)   | 114.5(2) |
| C(16)-C(15)-C(13)   | 110.2(2) |
| C(19)-C(15)-H(15)   | 105.3    |
| C(16)-C(15)-H(15)   | 105.3    |
| C(13)-C(15)-H(15)   | 105.3    |
| C(17)-C(16)-C(15)   | 114.8(2) |
| C(17)-C(16)-H(16A)  | 108.6    |
| C(15)-C(16)-H(16A)  | 108.6    |
| C(17)-C(16)-H(16B)  | 108.6    |
| C(15)-C(16)-H(16B)  | 108.6    |
| H(16A)-C(16)-H(16B) | 107.5    |
| C(8)-C(17)-C(16)    | 125.2(3) |
| C(8)-C(17)-H(17)    | 117.4    |
| C(16)-C(17)-H(17)   | 117.4    |
| C(19)-C(18)-H(18A)  | 109.5    |
| C(19)-C(18)-H(18B)  | 109.5    |
| H(18A)-C(18)-H(18B) | 109.5    |
| C(19)-C(18)-H(18C)  | 109.5    |

|                     |          |
|---------------------|----------|
| H(18A)-C(18)-H(18C) | 109.5    |
| H(18B)-C(18)-H(18C) | 109.5    |
| C(15)-C(19)-C(24)   | 114.7(2) |
| C(15)-C(19)-C(18)   | 112.8(2) |
| C(24)-C(19)-C(18)   | 105.7(2) |
| C(15)-C(19)-C(20)   | 108.8(2) |
| C(24)-C(19)-C(20)   | 101.3(2) |
| C(18)-C(19)-C(20)   | 113.1(2) |
| C(22)-C(20)-C(21)   | 106.7(2) |
| C(22)-C(20)-C(26)   | 118.5(2) |
| C(21)-C(20)-C(26)   | 108.1(2) |
| C(22)-C(20)-C(19)   | 109.4(2) |
| C(21)-C(20)-C(19)   | 113.8(2) |
| C(26)-C(20)-C(19)   | 100.6(2) |
| C(20)-C(21)-H(21A)  | 109.5    |
| C(20)-C(21)-H(21B)  | 109.5    |
| H(21A)-C(21)-H(21B) | 109.5    |
| C(20)-C(21)-H(21C)  | 109.5    |
| H(21A)-C(21)-H(21C) | 109.5    |
| H(21B)-C(21)-H(21C) | 109.5    |
| C(23)-C(22)-C(20)   | 109.2(2) |
| C(23)-C(22)-H(22A)  | 109.8    |
| C(20)-C(22)-H(22A)  | 109.8    |
| C(23)-C(22)-H(22B)  | 109.8    |
| C(20)-C(22)-H(22B)  | 109.8    |
| H(22A)-C(22)-H(22B) | 108.3    |
| O(5)-C(23)-C(22)    | 120.0(3) |
| O(5)-C(23)-C(13)    | 120.9(3) |
| C(22)-C(23)-C(13)   | 119.1(2) |
| C(25)-C(24)-C(19)   | 104.2(2) |
| C(25)-C(24)-H(24A)  | 110.9    |
| C(19)-C(24)-H(24A)  | 110.9    |
| C(25)-C(24)-H(24B)  | 110.9    |
| C(19)-C(24)-H(24B)  | 110.9    |
| H(24A)-C(24)-H(24B) | 108.9    |
| O(6)-C(25)-C(26)    | 106.6(2) |
| O(6)-C(25)-C(24)    | 112.4(2) |
| C(26)-C(25)-C(24)   | 107.6(2) |

|                     |          |
|---------------------|----------|
| O(6)-C(25)-H(25)    | 110.1    |
| C(26)-C(25)-H(25)   | 110.1    |
| C(24)-C(25)-H(25)   | 110.1    |
| C(27)-C(26)-C(25)   | 114.1(2) |
| C(27)-C(26)-C(20)   | 117.4(2) |
| C(25)-C(26)-C(20)   | 102.0(2) |
| C(27)-C(26)-H(26)   | 107.6    |
| C(25)-C(26)-H(26)   | 107.6    |
| C(20)-C(26)-H(26)   | 107.6    |
| N(1)-C(27)-C(28)    | 124.8(3) |
| N(1)-C(27)-C(26)    | 116.1(2) |
| C(28)-C(27)-C(26)   | 119.0(2) |
| C(27)-C(28)-H(28A)  | 109.5    |
| C(27)-C(28)-H(28B)  | 109.5    |
| H(28A)-C(28)-H(28B) | 109.5    |
| C(27)-C(28)-H(28C)  | 109.5    |
| H(28A)-C(28)-H(28C) | 109.5    |
| H(28B)-C(28)-H(28C) | 109.5    |
| O(7)-C(29)-O(6)     | 123.0(4) |
| O(7)-C(29)-C(30)    | 126.3(4) |
| O(6)-C(29)-C(30)    | 110.7(5) |
| C(29)-C(30)-H(30A)  | 109.5    |
| C(29)-C(30)-H(30B)  | 109.5    |
| H(30A)-C(30)-H(30B) | 109.5    |
| C(29)-C(30)-H(30C)  | 109.5    |
| H(30A)-C(30)-H(30C) | 109.5    |
| H(30B)-C(30)-H(30C) | 109.5    |
| C(32)-C(31)-H(31A)  | 109.5    |
| C(32)-C(31)-H(31B)  | 109.5    |
| H(31A)-C(31)-H(31B) | 109.5    |
| C(32)-C(31)-H(31C)  | 109.5    |
| H(31A)-C(31)-H(31C) | 109.5    |
| H(31B)-C(31)-H(31C) | 109.5    |
| O(9)-C(32)-O(10)    | 124.4(2) |
| O(9)-C(32)-C(31)    | 125.1(2) |
| O(10)-C(32)-C(31)   | 110.4(2) |
| C(34)-C(33)-H(33A)  | 109.5    |
| C(34)-C(33)-H(33B)  | 109.5    |

|                     |            |
|---------------------|------------|
| H(33A)-C(33)-H(33B) | 109.5      |
| C(34)-C(33)-H(33C)  | 109.5      |
| H(33A)-C(33)-H(33C) | 109.5      |
| H(33B)-C(33)-H(33C) | 109.5      |
| O(11)-C(34)-O(12)   | 123.3(2)   |
| O(11)-C(34)-C(33)   | 125.0(2)   |
| O(12)-C(34)-C(33)   | 111.7(2)   |
| O(10)-C(35)-C(40)   | 106.61(19) |
| O(10)-C(35)-C(36)   | 108.62(18) |
| C(40)-C(35)-C(36)   | 109.19(19) |
| O(10)-C(35)-H(35)   | 110.8      |
| C(40)-C(35)-H(35)   | 110.8      |
| C(36)-C(35)-H(35)   | 110.8      |
| O(12)-C(36)-C(35)   | 105.69(18) |
| O(12)-C(36)-C(37)   | 110.94(18) |
| C(35)-C(36)-C(37)   | 112.39(19) |
| O(12)-C(36)-H(36)   | 109.2      |
| C(35)-C(36)-H(36)   | 109.2      |
| C(37)-C(36)-H(36)   | 109.2      |
| C(42)-C(37)-C(38)   | 112.4(2)   |
| C(42)-C(37)-C(36)   | 108.35(19) |
| C(38)-C(37)-C(36)   | 108.94(19) |
| C(42)-C(37)-C(41)   | 107.8(2)   |
| C(38)-C(37)-C(41)   | 108.9(2)   |
| C(36)-C(37)-C(41)   | 110.4(2)   |
| C(46)-C(38)-C(39)   | 121.5(2)   |
| C(46)-C(38)-C(37)   | 121.5(2)   |
| C(39)-C(38)-C(37)   | 116.66(19) |
| C(38)-C(39)-C(40)   | 111.05(19) |
| C(38)-C(39)-C(43)   | 113.1(2)   |
| C(40)-C(39)-C(43)   | 111.06(19) |
| C(38)-C(39)-H(39)   | 107.1      |
| C(40)-C(39)-H(39)   | 107.1      |
| C(43)-C(39)-H(39)   | 107.1      |
| C(35)-C(40)-C(39)   | 110.6(2)   |
| C(35)-C(40)-H(40A)  | 109.5      |
| C(39)-C(40)-H(40A)  | 109.5      |
| C(35)-C(40)-H(40B)  | 109.5      |

|                     |            |
|---------------------|------------|
| C(39)-C(40)-H(40B)  | 109.5      |
| H(40A)-C(40)-H(40B) | 108.1      |
| C(37)-C(41)-H(41A)  | 109.5      |
| C(37)-C(41)-H(41B)  | 109.5      |
| H(41A)-C(41)-H(41B) | 109.5      |
| C(37)-C(41)-H(41C)  | 109.5      |
| H(41A)-C(41)-H(41C) | 109.5      |
| H(41B)-C(41)-H(41C) | 109.5      |
| C(37)-C(42)-H(42A)  | 109.5      |
| C(37)-C(42)-H(42B)  | 109.5      |
| H(42A)-C(42)-H(42B) | 109.5      |
| C(37)-C(42)-H(42C)  | 109.5      |
| H(42A)-C(42)-H(42C) | 109.5      |
| H(42B)-C(42)-H(42C) | 109.5      |
| C(47)-C(43)-C(53)   | 109.8(2)   |
| C(47)-C(43)-C(44)   | 107.7(2)   |
| C(53)-C(43)-C(44)   | 111.32(19) |
| C(47)-C(43)-C(39)   | 110.8(2)   |
| C(53)-C(43)-C(39)   | 105.1(2)   |
| C(44)-C(43)-C(39)   | 112.22(19) |
| C(45)-C(44)-C(48)   | 114.5(2)   |
| C(45)-C(44)-C(43)   | 110.5(2)   |
| C(48)-C(44)-C(43)   | 114.7(2)   |
| C(45)-C(44)-H(44)   | 105.4      |
| C(48)-C(44)-H(44)   | 105.4      |
| C(43)-C(44)-H(44)   | 105.4      |
| C(46)-C(45)-C(44)   | 115.0(2)   |
| C(46)-C(45)-H(45A)  | 108.5      |
| C(44)-C(45)-H(45A)  | 108.5      |
| C(46)-C(45)-H(45B)  | 108.5      |
| C(44)-C(45)-H(45B)  | 108.5      |
| H(45A)-C(45)-H(45B) | 107.5      |
| C(38)-C(46)-C(45)   | 125.7(2)   |
| C(38)-C(46)-H(46)   | 117.1      |
| C(45)-C(46)-H(46)   | 117.1      |
| C(43)-C(47)-H(47A)  | 109.5      |
| C(43)-C(47)-H(47B)  | 109.5      |
| H(47A)-C(47)-H(47B) | 109.5      |

|                     |            |
|---------------------|------------|
| C(43)-C(47)-H(47C)  | 109.5      |
| H(47A)-C(47)-H(47C) | 109.5      |
| H(47B)-C(47)-H(47C) | 109.5      |
| C(44)-C(48)-C(49)   | 113.2(2)   |
| C(44)-C(48)-C(54)   | 113.9(2)   |
| C(49)-C(48)-C(54)   | 106.5(2)   |
| C(44)-C(48)-C(50)   | 109.2(2)   |
| C(49)-C(48)-C(50)   | 112.2(2)   |
| C(54)-C(48)-C(50)   | 101.16(19) |
| C(48)-C(49)-H(49A)  | 109.5      |
| C(48)-C(49)-H(49B)  | 109.5      |
| H(49A)-C(49)-H(49B) | 109.5      |
| C(48)-C(49)-H(49C)  | 109.5      |
| H(49A)-C(49)-H(49C) | 109.5      |
| H(49B)-C(49)-H(49C) | 109.5      |
| C(52)-C(50)-C(51)   | 106.4(2)   |
| C(52)-C(50)-C(56)   | 119.6(2)   |
| C(51)-C(50)-C(56)   | 108.3(2)   |
| C(52)-C(50)-C(48)   | 109.24(19) |
| C(51)-C(50)-C(48)   | 113.4(2)   |
| C(56)-C(50)-C(48)   | 100.10(19) |
| C(50)-C(51)-H(51A)  | 109.5      |
| C(50)-C(51)-H(51B)  | 109.5      |
| H(51A)-C(51)-H(51B) | 109.5      |
| C(50)-C(51)-H(51C)  | 109.5      |
| H(51A)-C(51)-H(51C) | 109.5      |
| H(51B)-C(51)-H(51C) | 109.5      |
| C(53)-C(52)-C(50)   | 108.8(2)   |
| C(53)-C(52)-H(52A)  | 109.9      |
| C(50)-C(52)-H(52A)  | 109.9      |
| C(53)-C(52)-H(52B)  | 109.9      |
| C(50)-C(52)-H(52B)  | 109.9      |
| H(52A)-C(52)-H(52B) | 108.3      |
| O(13)-C(53)-C(52)   | 119.9(2)   |
| O(13)-C(53)-C(43)   | 120.9(2)   |
| C(52)-C(53)-C(43)   | 119.2(2)   |
| C(48)-C(54)-C(55)   | 104.6(2)   |
| C(48)-C(54)-H(54A)  | 110.8      |

|                     |            |
|---------------------|------------|
| C(55)-C(54)-H(54A)  | 110.8      |
| C(48)-C(54)-H(54B)  | 110.8      |
| C(55)-C(54)-H(54B)  | 110.8      |
| H(54A)-C(54)-H(54B) | 108.9      |
| O(16)-C(55)-C(56)   | 109.4(2)   |
| O(16)-C(55)-C(54)   | 112.3(2)   |
| C(56)-C(55)-C(54)   | 107.24(19) |
| O(16)-C(55)-H(55)   | 109.3      |
| C(56)-C(55)-H(55)   | 109.3      |
| C(54)-C(55)-H(55)   | 109.3      |
| C(59)-C(56)-C(55)   | 114.4(2)   |
| C(59)-C(56)-C(50)   | 118.9(2)   |
| C(55)-C(56)-C(50)   | 100.5(2)   |
| C(59)-C(56)-H(56)   | 107.4      |
| C(55)-C(56)-H(56)   | 107.4      |
| C(50)-C(56)-H(56)   | 107.4      |
| C(58)-C(57)-H(57A)  | 109.5      |
| C(58)-C(57)-H(57B)  | 109.5      |
| H(57A)-C(57)-H(57B) | 109.5      |
| C(58)-C(57)-H(57C)  | 109.5      |
| H(57A)-C(57)-H(57C) | 109.5      |
| H(57B)-C(57)-H(57C) | 109.5      |
| O(15)-C(58)-O(16)   | 124.1(3)   |
| O(15)-C(58)-C(57)   | 124.2(3)   |
| O(16)-C(58)-C(57)   | 111.7(3)   |
| N(2)-C(59)-C(60)    | 125.7(2)   |
| N(2)-C(59)-C(56)    | 115.8(2)   |
| C(60)-C(59)-C(56)   | 118.2(2)   |
| C(59)-C(60)-H(60A)  | 109.5      |
| C(59)-C(60)-H(60B)  | 109.5      |
| H(60A)-C(60)-H(60B) | 109.5      |
| C(59)-C(60)-H(60C)  | 109.5      |
| H(60A)-C(60)-H(60C) | 109.5      |
| H(60B)-C(60)-H(60C) | 109.5      |
| C(27)-N(1)-O(8)     | 112.4(2)   |
| C(59)-N(2)-O(14)    | 112.5(2)   |
| C(2)-O(2)-C(6)      | 118.8(2)   |
| C(4)-O(4)-C(5)      | 118.90(19) |

|                   |            |
|-------------------|------------|
| C(29)-O(6)-C(25)  | 117.0(4)   |
| N(1)-O(8)-H(8)    | 109.5      |
| C(32)-O(10)-C(35) | 117.36(19) |
| C(34)-O(12)-C(36) | 118.43(19) |
| N(2)-O(14)-H(14)  | 109.5      |
| C(58)-O(16)-C(55) | 115.6(2)   |

---
